# Supplementary material for: What Other Than Acridinium Esters? Computational Search for New Acridinium-Based Chemiluminogens
Source: MDPI journal article supplement (doi:10.3390/ijms24119468), 2023-05-30
Supplement: s1 [file s1]

## **Supplementary Materials**

### **What else than acridinium esters? Computational search for new acridinium-based chemiluminogens**

**Milena Pieńkos and Beata Zadykowicz\***

*Faculty of Chemistry, University of Gdańsk,  
Wita Stwosza 63, 80-308 Gdańsk, Poland*

*\*Correspondence: [beata.zadykowicz@ug.edu.pl](mailto:beata.zadykowicz@ug.edu.pl)*

**Figure S1.** The Highest Occupied Molecular Orbital (HOMO) and Lowest Unoccupied Molecular Orbital (LUMO) of investigated potential chemiluminogens (R – the central atom in leaving group).

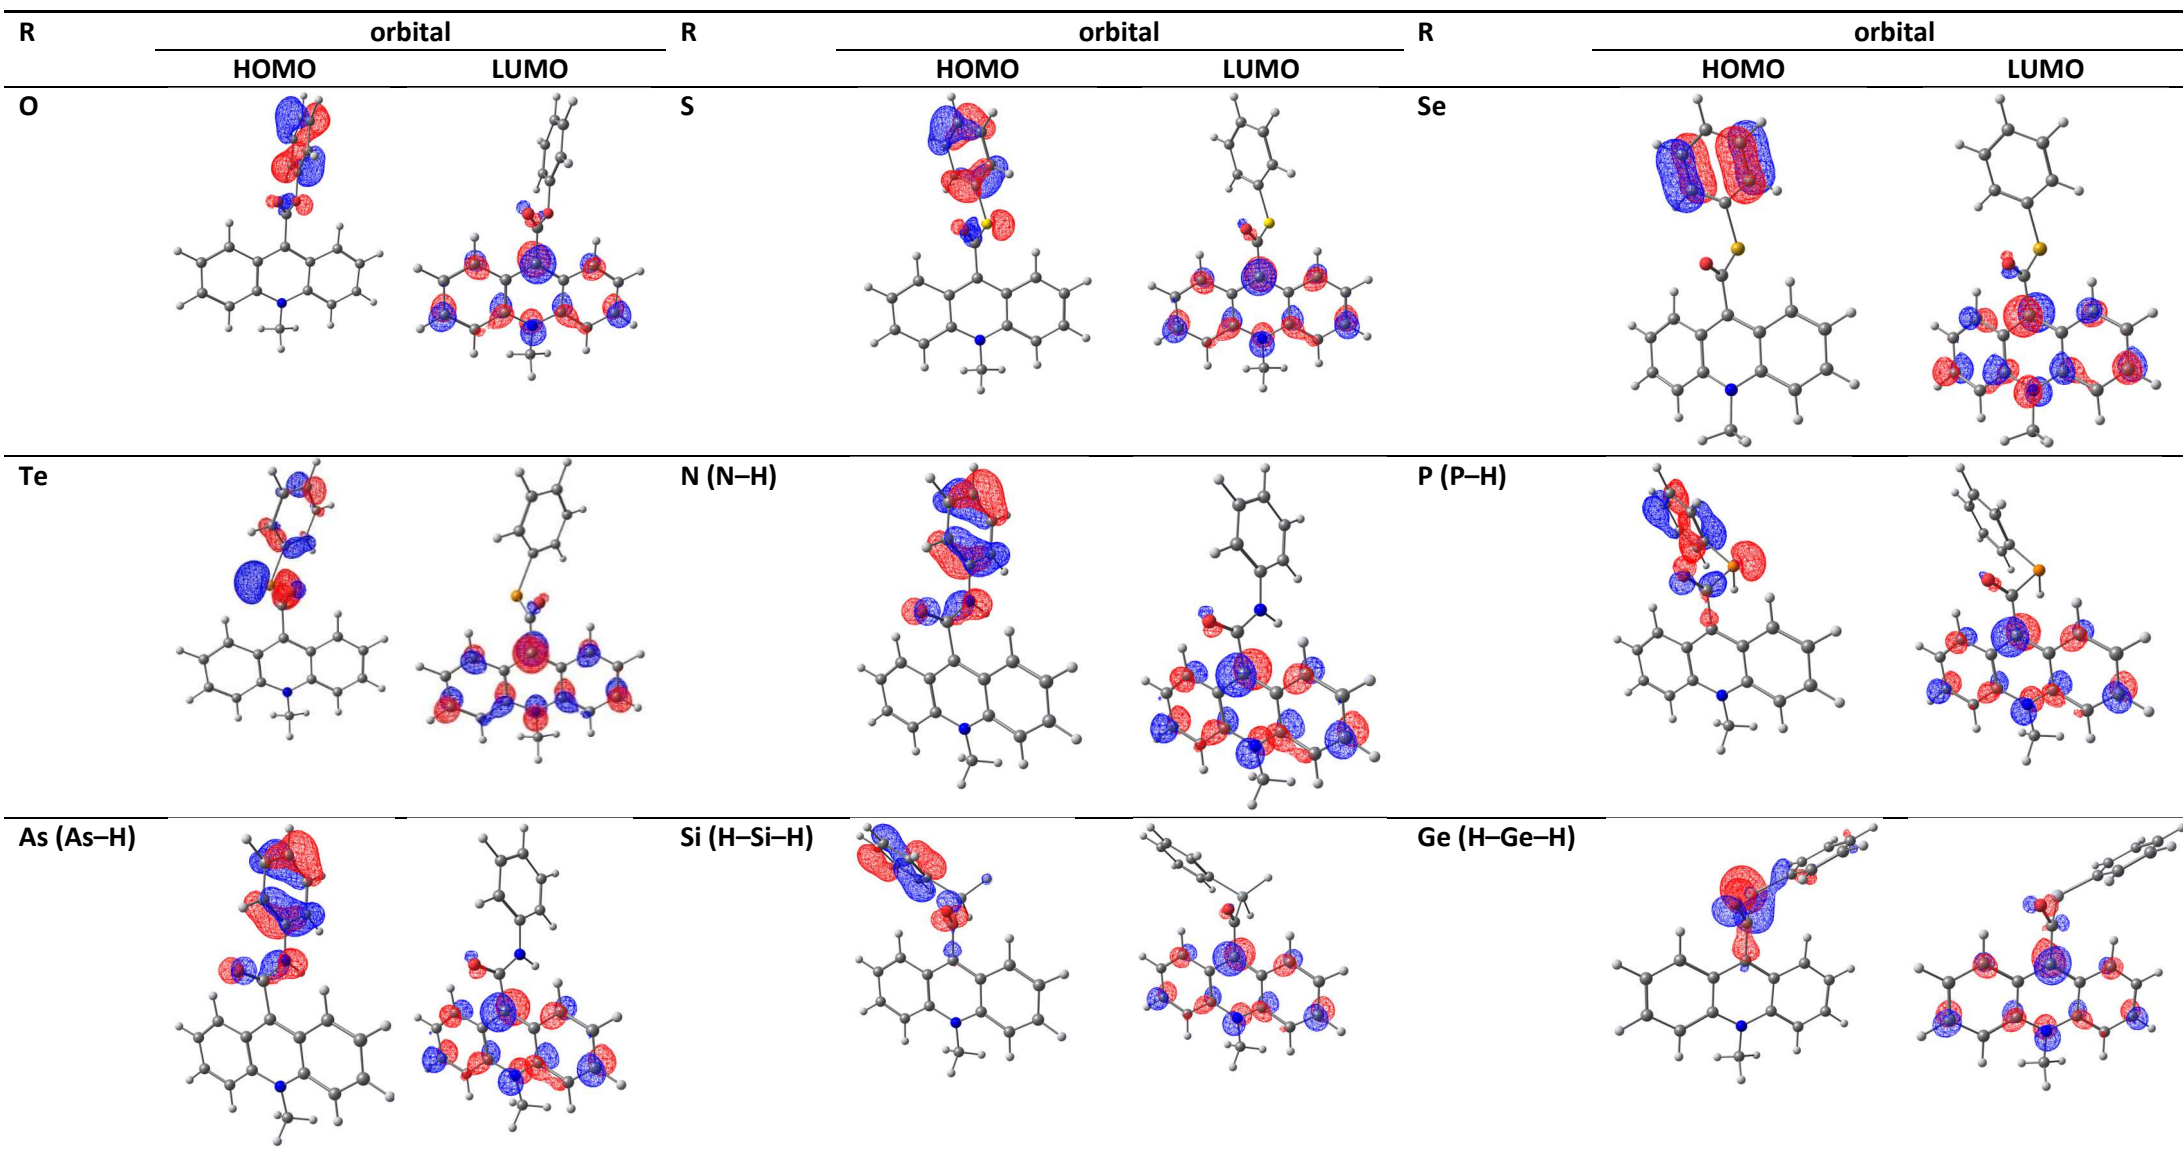

**Table S1.** The thermodynamic data of the light pathway of chemiluminescence reaction (step I, II, Scheme 1) and the competitive pathways (step IV – formation of the ‘pseudobase’ and step V – hydrolysis of the acridinium cation, Scheme 1) calculated with different basis sets (LanL2DZ and 6-31G(d,p)) for selected derivatives (R).

| Step no.<br>(Scheme 1) | R  | Basis set for R | gaseous phase       |                     | aqueous phase       | Step no.<br>(Scheme 1) | R  | Basis set for R | gaseous phase       |                     | aqueous phase       |
|------------------------|----|-----------------|---------------------|---------------------|---------------------|------------------------|----|-----------------|---------------------|---------------------|---------------------|
|                        |    |                 | $\Delta_{r,298}H^0$ | $\Delta_{r,298}G^0$ | $\Delta_{r,298}G^0$ |                        |    |                 | $\Delta_{r,298}H^0$ | $\Delta_{r,298}G^0$ | $\Delta_{r,298}G^0$ |
| I                      | Te | LanL2DZ         | −165.8              | −198.8              | −82.7               | II                     | Te | LanL2DZ         | −104.1              | −117.1              | −65.9               |
|                        |    | 6-31G(d,p)      | −166.6 <sup>a</sup> | −153.6 <sup>a</sup> | −51.5 <sup>a</sup>  |                        |    | 6-31G(d,p)      | −60.5               | −73.7               | −47.6               |
|                        | S  | LanL2DZ         | −175.1              | −162.3              | −54.2               |                        | S  | LanL2DZ         | −71.1               | −85.1               | −59.6               |
|                        |    | 6-31G(d,p)      | −166.2 <sup>b</sup> | −153.0 <sup>b</sup> | −43.1 <sup>b</sup>  |                        |    | 6-31G(d,p)      | −80.1 <sup>b</sup>  | −93.2 <sup>b</sup>  | −69.0 <sup>b</sup>  |
|                        |    | LanL2DZ         | −165.1              | −152.1              | −42.5               |                        |    | LanL2DZ         | −96.2               | −108.8              | −84.0               |
|                        | Se | 6-31G(d,p)      | −166.3              | −153.1              | −43.8               |                        | Se | 6-31G(d,p)      | −73.1               | −86.4               | −60.8               |
|                        |    | LanL2DZ         | −165.2              | −153.6              | −42.3               |                        |    | LanL2DZ         | −94.6               | −103.9              | −62.8               |
| IV                     | Te | LanL2DZ         | −191.5              | −179.2              | −103.2              | V                      | Te | LanL2DZ         | −115.5              | −162.9              | −105.4              |
|                        |    | 6-31G(d,p)      | −186.1 <sup>a</sup> | −175.6 <sup>a</sup> | −73.3 <sup>a</sup>  |                        |    | 6-31G(d,p)      | −72.5               | −74.3               | −49.1               |
|                        | S  | LanL2DZ         | −196.2              | −186.6              | −70.1               |                        | S  | LanL2DZ         | −92.9               | −94.4               | −70.6               |
|                        |    | 6-31G(d,p)      | −197.1 <sup>b</sup> | −187.5 <sup>b</sup> | −61.9 <sup>b</sup>  |                        |    | 6-31G(d,p)      | −92.0 <sup>b</sup>  | −93.2 <sup>b</sup>  | −68.9 <sup>b</sup>  |
|                        |    | LanL2DZ         | −188.9              | −187.0              | −60.9               |                        |    | LanL2DZ         | −107.0              | −107.9              | −83.3               |
|                        | Se | 6-31G(d,p)      | −166.3              | −153.1              | −43.8               |                        | Se | 6-31G(d,p)      | −73.1               | −86.4               | −60.8               |
|                        |    | LanL2DZ         | −191.2              | −182.7              | −62.8               |                        |    | LanL2DZ         | −109.1              | −111.5              | −86.2               |

$\Delta_{r,298}H^0$  and  $\Delta_{r,298}G^0$  (both in kcal mol<sup>−1</sup>), respectively, represent the enthalpy and Gibbs’ free energy (gaseous phase) or free energy (aqueous phase) of the reaction corresponding to a given step number at standard temperature and pressure;  
<sup>a</sup> [1]; <sup>b</sup> [2].

[1] Krzymiński, K.; Ożóg, A.; Malecha, P.; Roshal, A.D.; Wróblewska, A.; Zadykowicz, B.; Błażejowski, J. Chemiluminogenic Features of 10-Methyl-9-(Phenoxycarbonyl)Acridinium Trifluoromethanesulfonates Alkyl Substituted at the Benzene Ring in Aqueous Media. *J. Org. Chem.* **2011**, *76*, 1072–1085. <https://doi.org/10.1021/jo1020882>.  
[2] Pieńkos, M.; Zadykowicz, B. Computational Insights on the Mechanism of the Chemiluminescence Reaction of New Group of Chemiluminogens – 10-Methyl-9-thiophenoxycarbonylacridinium Cations. *Int. J. Mol. Sci.* **2020**, *21*, 4417. <https://doi.org/10.3390/ijms21124417>.

**Figure S2.** The diagram of relative free energy in aqueous phase of the first steps of reaction leading to the light emission (step I, Scheme 1) and competitive reactions (step IV – formation of ‘pseudobase’ and step V – formation of 10-methyl-9-carboxyacridinium acid (hydrolysis of the compound)) of the selected acridinium R-esters (Table 1).

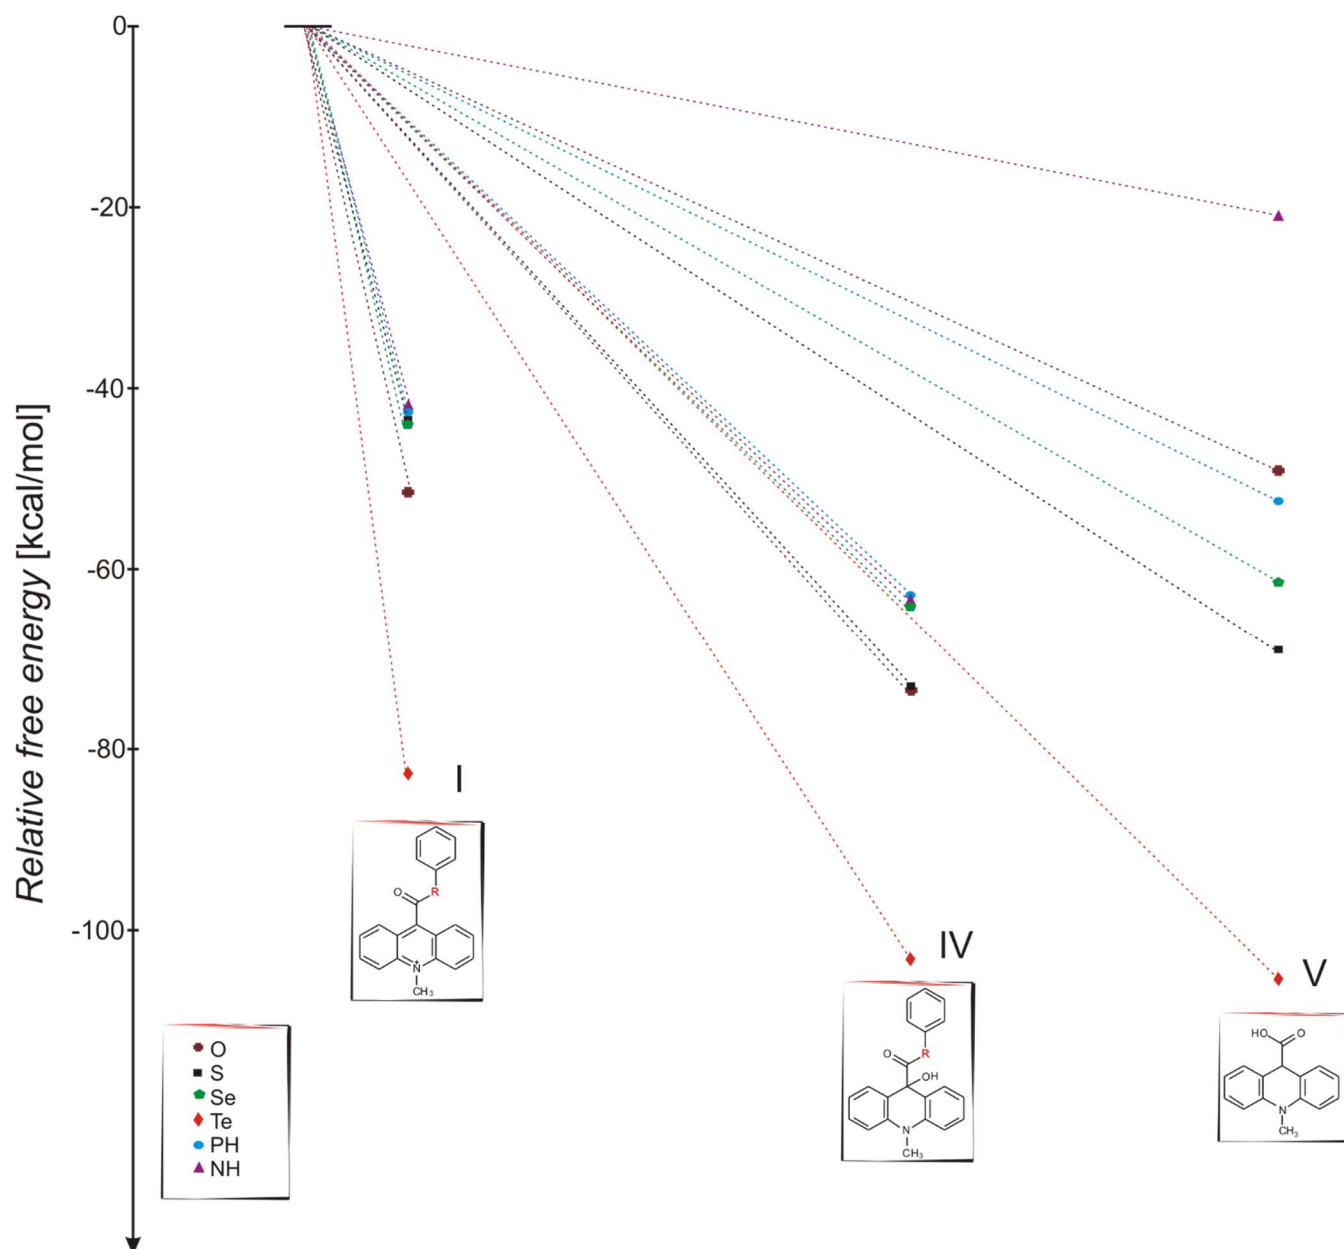

**Table S2.** Cartesian coordinates and structures of the lowest energy structures of investigated molecules. List of abbreviations:  
\* – excited product, S<sub>1</sub> – first singlet state.

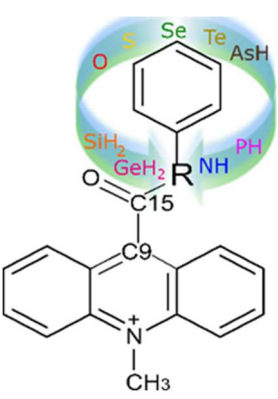

| R = Se                |              |              |              | 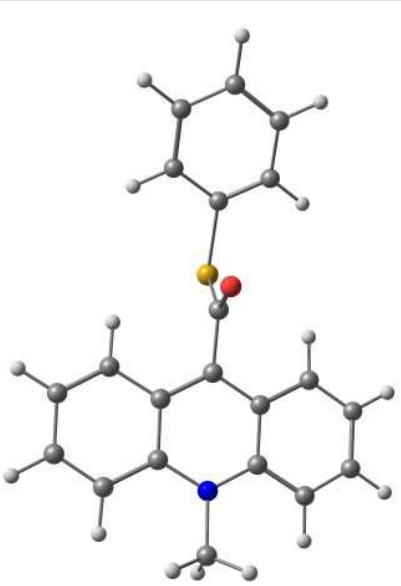 |
|-----------------------|--------------|--------------|--------------|-------------------------------------------------------------------------------------|
| Structure no. 1       |              |              |              |                                                                                     |
| E = -3339.05392109 Ha |              |              |              |                                                                                     |
| Atom                  | X            | Y            | Z            |                                                                                     |
| C                     | 3.026493000  | 1.205623000  | 0.132682000  |                                                                                     |
| C                     | 3.718741000  | 2.438874000  | 0.067188000  |                                                                                     |
| C                     | 3.014903000  | 3.620651000  | -0.037465000 |                                                                                     |
| C                     | 1.600712000  | 3.642912000  | -0.091613000 |                                                                                     |
| C                     | 0.904764000  | 2.464152000  | -0.037858000 |                                                                                     |
| C                     | 1.590978000  | 1.219195000  | 0.084490000  |                                                                                     |
| H                     | 4.799042000  | 2.472951000  | 0.058936000  |                                                                                     |
| H                     | 3.565464000  | 4.553752000  | -0.100840000 |                                                                                     |
| H                     | 1.077864000  | 4.586895000  | -0.196166000 |                                                                                     |
| H                     | -0.173409000 | 2.442833000  | -0.144760000 |                                                                                     |
| C                     | 0.896503000  | -0.000046000 | 0.146445000  |                                                                                     |
| C                     | 1.591220000  | -1.219134000 | 0.084562000  |                                                                                     |
| C                     | 3.026745000  | -1.205252000 | 0.132718000  |                                                                                     |
| N                     | 3.688225000  | 0.000254000  | 0.251494000  |                                                                                     |
| C                     | -0.595391000 | -0.000038000 | 0.426849000  |                                                                                     |
| C                     | 5.142636000  | 0.000343000  | 0.513242000  |                                                                                     |
| C                     | 0.905271000  | -2.464256000 | -0.037690000 |                                                                                     |
| C                     | 1.601474000  | -3.642866000 | -0.091471000 |                                                                                     |
| C                     | 3.015659000  | -3.620288000 | -0.037405000 |                                                                                     |
| C                     | 3.719251000  | -2.438360000 | 0.067231000  |                                                                                     |
| H                     | -0.172903000 | -2.443186000 | -0.144586000 |                                                                                     |
| H                     | 1.078830000  | -4.586966000 | -0.195994000 |                                                                                     |
| H                     | 3.566430000  | -4.553262000 | -0.100846000 |                                                                                     |
| H                     | 4.799559000  | -2.472192000 | 0.058952000  |                                                                                     |
| H                     | 5.400583000  | 0.876162000  | 1.102711000  |                                                                                     |
| H                     | 5.400579000  | -0.875196000 | 1.103142000  |                                                                                     |
| H                     | 5.709299000  | 0.000143000  | -0.421747000 |                                                                                     |
| Se                    | -1.714309000 | -0.000537000 | -1.132899000 |                                                                                     |
| O                     | -0.969538000 | 0.000408000  | 1.575058000  |                                                                                     |
| C                     | -3.423868000 | -0.000150000 | -0.255519000 |                                                                                     |
| C                     | -4.043887000 | 1.216285000  | 0.039046000  |                                                                                     |
| C                     | -5.298761000 | 1.211153000  | 0.647571000  |                                                                                     |
| C                     | -5.923269000 | 0.000248000  | 0.952905000  |                                                                                     |
| C                     | -5.298646000 | -1.210868000 | 0.648609000  |                                                                                     |
| C                     | -4.043804000 | -1.216391000 | 0.040057000  |                                                                                     |
| H                     | -3.558192000 | 2.153953000  | -0.208634000 |                                                                                     |
| H                     | -5.787755000 | 2.151717000  | 0.880376000  |                                                                                     |
| H                     | -6.900928000 | 0.000411000  | 1.424378000  |                                                                                     |
| H                     | -5.787548000 | -2.151287000 | 0.882193000  |                                                                                     |
| H                     | -3.558014000 | -2.154209000 | -0.206901000 |                                                                                     |

| R = Se                |              |              |              | 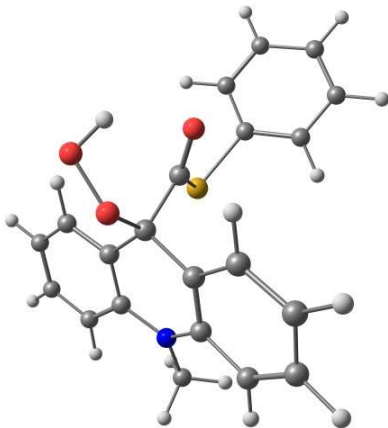 |
|-----------------------|--------------|--------------|--------------|-------------------------------------------------------------------------------------|
| Structure no. 2       |              |              |              |                                                                                     |
| E = -3490.21432860 Ha |              |              |              |                                                                                     |
| Atom                  | X            | Y            | Z            |                                                                                     |
| C                     | 1.454506000  | -2.450311000 | 0.884827000  |                                                                                     |
| C                     | 1.642049000  | -1.134024000 | 0.437317000  |                                                                                     |
| C                     | 2.477137000  | -0.898320000 | -0.678658000 |                                                                                     |
| C                     | 3.153006000  | -1.991721000 | -1.258926000 |                                                                                     |
| C                     | 2.963359000  | -3.283097000 | -0.783534000 |                                                                                     |
| C                     | 2.102922000  | -3.524236000 | 0.287678000  |                                                                                     |
| C                     | 0.951421000  | 0.003732000  | 1.163136000  |                                                                                     |
| C                     | 1.382167000  | 1.366696000  | 0.650542000  |                                                                                     |
| C                     | 2.206698000  | 1.507822000  | -0.485372000 |                                                                                     |
| N                     | 2.634749000  | 0.389700000  | -1.202428000 |                                                                                     |
| C                     | 2.602405000  | 2.807630000  | -0.865058000 |                                                                                     |
| C                     | 2.155662000  | 3.923783000  | -0.168424000 |                                                                                     |
| C                     | 1.312849000  | 3.783729000  | 0.935243000  |                                                                                     |
| C                     | 0.941261000  | 2.506386000  | 1.335504000  |                                                                                     |
| C                     | -0.592927000 | -0.071091000 | 1.014365000  |                                                                                     |
| O                     | -1.371123000 | 0.283209000  | 1.866980000  |                                                                                     |
| O                     | 1.281443000  | 0.070220000  | 2.572143000  |                                                                                     |
| O                     | 0.594091000  | -0.969624000 | 3.322573000  |                                                                                     |
| C                     | 3.230423000  | 0.565038000  | -2.520884000 |                                                                                     |
| Se                    | -1.111786000 | -0.723849000 | -0.746682000 |                                                                                     |
| C                     | -2.970695000 | -0.234969000 | -0.631562000 |                                                                                     |
| C                     | -3.389725000 | 1.023464000  | -1.071449000 |                                                                                     |
| C                     | -4.741076000 | 1.364774000  | -1.011220000 |                                                                                     |
| C                     | -5.671844000 | 0.451179000  | -0.513099000 |                                                                                     |
| C                     | -5.251199000 | -0.805174000 | -0.073750000 |                                                                                     |
| C                     | -3.900568000 | -1.150380000 | -0.132728000 |                                                                                     |
| H                     | 3.284802000  | 2.948298000  | -1.693362000 |                                                                                     |
| H                     | 2.481267000  | 4.909538000  | -0.487907000 |                                                                                     |
| H                     | 0.960658000  | 4.653252000  | 1.480040000  |                                                                                     |
| H                     | 0.299948000  | 2.368078000  | 2.198026000  |                                                                                     |
| H                     | 0.803203000  | -2.612586000 | 1.734129000  |                                                                                     |
| H                     | 1.944216000  | -4.532171000 | 0.656451000  |                                                                                     |
| H                     | 3.499514000  | -4.102811000 | -1.253018000 |                                                                                     |
| H                     | 3.851688000  | -1.831532000 | -2.069949000 |                                                                                     |
| H                     | 2.793191000  | 1.439613000  | -3.003660000 |                                                                                     |
| H                     | 4.320866000  | 0.690224000  | -2.485186000 |                                                                                     |
| H                     | 2.996861000  | -0.299176000 | -3.143258000 |                                                                                     |
| H                     | -3.567360000 | -2.125283000 | 0.207623000  |                                                                                     |
| H                     | -5.972864000 | -1.517044000 | 0.316069000  |                                                                                     |
| H                     | -6.723647000 | 0.717961000  | -0.467766000 |                                                                                     |
| H                     | -5.065321000 | 2.343733000  | -1.351895000 |                                                                                     |
| H                     | -2.661385000 | 1.730438000  | -1.455323000 |                                                                                     |
| H                     | -0.270411000 | -0.533479000 | 3.445918000  |                                                                                     |

| R = Se                |              |              |             |                                                                                       |
|-----------------------|--------------|--------------|-------------|---------------------------------------------------------------------------------------|
| Structure no. 4       |              |              |             |                                                                                       |
| E = -2631.07370596 Ha |              |              |             |                                                                                       |
| Atom                  | X            | Y            | Z           | 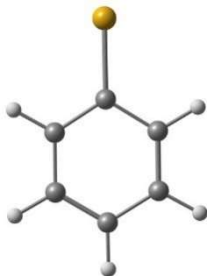 |
| C                     | 0.000000000  | -0.029477000 | 0.000000000 |                                                                                       |
| C                     | -1.198754000 | -0.787255000 | 0.000000000 |                                                                                       |
| C                     | -1.200325000 | -2.179999000 | 0.000000000 |                                                                                       |
| C                     | 0.000000000  | -2.900719000 | 0.000000000 |                                                                                       |
| C                     | 1.200325000  | -2.179999000 | 0.000000000 |                                                                                       |
| C                     | 1.198754000  | -0.787256000 | 0.000000000 |                                                                                       |
| H                     | -2.140954000 | -0.245081000 | 0.000000000 |                                                                                       |
| H                     | 2.140954000  | -0.245081000 | 0.000000000 |                                                                                       |
| Se                    | 0.000000000  | 1.855686000  | 0.000000000 |                                                                                       |
| H                     | -2.151472000 | -2.713114000 | 0.000000000 |                                                                                       |
| H                     | 0.000000000  | -3.988703000 | 0.000000000 |                                                                                       |
| H                     | 2.151472000  | -2.713114000 | 0.000000000 |                                                                                       |

| R = Se                |              |              |              |
|-----------------------|--------------|--------------|--------------|
| Structure no. 6       |              |              |              |
| E = -3415.08976629 Ha |              |              |              |
| Atom                  | X            | Y            | Z            |
| C                     | 3.631695000  | -1.211021000 | -0.336270000 |
| C                     | 2.942199000  | -0.000020000 | -0.436718000 |
| C                     | 3.631719000  | 1.210988000  | -0.336522000 |
| C                     | 5.012411000  | 1.209013000  | -0.135834000 |
| C                     | 5.702874000  | -0.000002000 | -0.035776000 |
| C                     | 5.012370000  | -1.209030000 | -0.135591000 |
| Se                    | 1.044003000  | 0.000124000  | -0.759201000 |
| C                     | 0.490016000  | 0.000156000  | 1.098656000  |
| O                     | 1.269093000  | 0.000220000  | 2.024594000  |
| C                     | -1.057390000 | -0.000025000 | 1.374159000  |
| C                     | -1.675618000 | -1.247725000 | 0.754770000  |
| C                     | -2.123352000 | -1.210268000 | -0.581335000 |
| N                     | -2.051452000 | -0.000051000 | -1.295081000 |
| C                     | -2.123503000 | 1.210118000  | -0.581290000 |
| C                     | -1.675752000 | 1.247604000  | 0.754811000  |
| C                     | -1.765980000 | -2.431654000 | 1.484460000  |
| C                     | -2.269827000 | -3.594967000 | 0.904653000  |
| C                     | -2.696353000 | -3.563245000 | -0.422586000 |
| C                     | -2.635547000 | -2.382333000 | -1.160324000 |
| C                     | -2.635766000 | 2.382166000  | -1.160275000 |
| C                     | -2.696600000 | 3.563090000  | -0.422561000 |
| C                     | -2.270037000 | 3.594846000  | 0.904665000  |
| C                     | -1.766138000 | 2.431556000  | 1.484466000  |
| C                     | -2.196153000 | -0.000047000 | -2.739897000 |
| H                     | -3.014150000 | -2.370708000 | -2.175542000 |
| H                     | -3.098563000 | -4.457838000 | -0.889251000 |
| H                     | -2.328015000 | -4.512441000 | 1.481445000  |
| H                     | -1.438581000 | -2.420351000 | 2.518059000  |
| H                     | -1.438681000 | 2.420291000  | 2.518049000  |
| H                     | -2.328194000 | 4.512328000  | 1.481447000  |
| H                     | -3.098866000 | 4.457653000  | -0.889234000 |
| H                     | -3.014353000 | 2.370492000  | -2.175497000 |
| H                     | -1.698938000 | -0.882299000 | -3.147515000 |
| H                     | -3.243525000 | 0.000042000  | -3.075167000 |
| H                     | -1.698775000 | 0.882112000  | -3.147537000 |
| H                     | 3.090590000  | 2.148337000  | -0.414389000 |
| H                     | 5.546609000  | 2.151244000  | -0.056695000 |
| H                     | 6.777793000  | -0.000028000 | 0.119303000  |
| H                     | 5.546587000  | -2.151238000 | -0.056286000 |
| H                     | 3.090504000  | -2.148356000 | -0.413936000 |
| O                     | -1.206438000 | 0.000011000  | 2.776686000  |
| H                     | -0.300204000 | -0.000153000 | 3.136915000  |

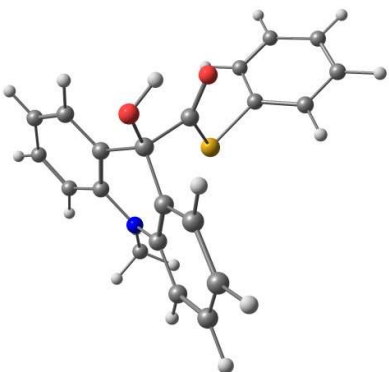

| R = Te                |              |              |              |
|-----------------------|--------------|--------------|--------------|
| Structure no. 1       |              |              |              |
| E = -947.677215217 Ha |              |              |              |
| Atom                  | X            | Y            | Z            |
| C                     | -4.062906000 | -0.842494000 | 0.983458000  |
| C                     | -3.383205000 | 0.115720000  | 0.220410000  |
| C                     | -3.928313000 | 0.588652000  | -0.979511000 |
| C                     | -5.155338000 | 0.088819000  | -1.418856000 |
| C                     | -5.839760000 | -0.861856000 | -0.659461000 |
| C                     | -5.296094000 | -1.323654000 | 0.541018000  |
| Te                    | -1.516203000 | 0.870465000  | 0.919442000  |
| C                     | -0.405409000 | 0.003896000  | -0.768783000 |
| O                     | -0.939575000 | -0.430581000 | -1.758631000 |
| C                     | 1.081673000  | -0.104461000 | -0.531125000 |
| C                     | 1.652757000  | -1.384340000 | -0.357479000 |
| C                     | 3.035789000  | -1.482067000 | 0.021711000  |
| N                     | 3.767743000  | -0.330291000 | 0.233832000  |
| C                     | 3.270979000  | 0.914748000  | -0.090432000 |
| C                     | 1.890731000  | 1.047924000  | -0.471736000 |
| C                     | 3.618642000  | -2.764407000 | 0.165750000  |
| C                     | 2.857724000  | -3.897157000 | -0.033505000 |
| C                     | 1.488223000  | -3.813951000 | -0.376499000 |
| C                     | 0.900924000  | -2.585291000 | -0.536672000 |
| C                     | 4.089219000  | 2.069944000  | -0.067151000 |
| C                     | 3.561879000  | 3.300446000  | -0.400271000 |
| C                     | 2.206419000  | 3.446444000  | -0.774701000 |
| C                     | 1.392619000  | 2.342952000  | -0.813689000 |
| C                     | 5.119354000  | -0.435341000 | 0.821490000  |
| H                     | 4.669283000  | -2.875753000 | 0.394055000  |
| H                     | 3.327519000  | -4.870497000 | 0.066615000  |
| H                     | 0.911389000  | -4.719898000 | -0.526178000 |
| H                     | -0.138213000 | -2.510542000 | -0.830181000 |
| H                     | 0.361334000  | 2.437815000  | -1.131035000 |
| H                     | 1.820792000  | 4.422423000  | -1.047642000 |
| H                     | 4.211774000  | 4.169770000  | -0.392550000 |
| H                     | 5.142060000  | 2.001860000  | 0.168156000  |
| H                     | 5.150540000  | -1.285411000 | 1.498130000  |
| H                     | 5.879400000  | -0.550307000 | 0.043672000  |
| H                     | 5.324755000  | 0.455048000  | 1.410117000  |
| H                     | -3.407854000 | 1.335974000  | -1.568040000 |
| H                     | -5.578132000 | 0.450134000  | -2.351339000 |
| H                     | -6.797868000 | -1.240968000 | -1.001575000 |
| H                     | -5.827604000 | -2.062397000 | 1.133202000  |
| H                     | -3.639672000 | -1.211906000 | 1.912026000  |

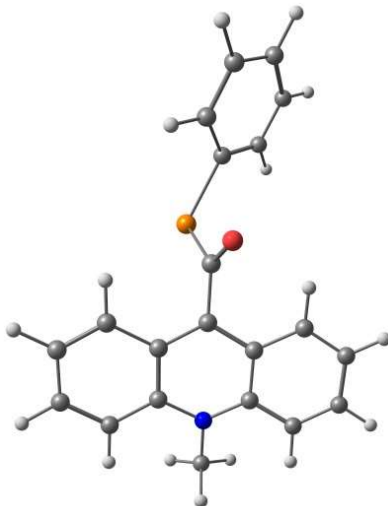



| R = Te                |              |              |              | 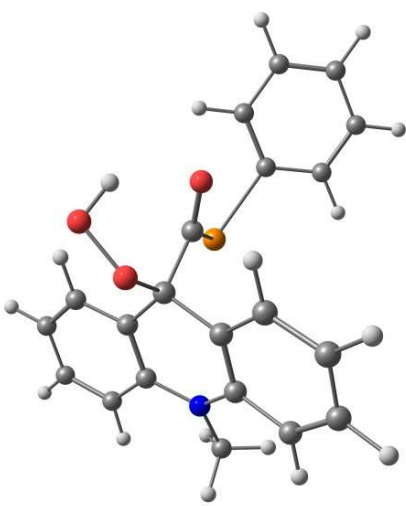 |
|-----------------------|--------------|--------------|--------------|-------------------------------------------------------------------------------------|
| Structure no. 2       |              |              |              |                                                                                     |
| E = -1098.83706374 Ha |              |              |              |                                                                                     |
| Atom                  | X            | Y            | Z            |                                                                                     |
| C                     | -3.876335000 | -0.736580000 | 0.549231000  |                                                                                     |
| C                     | -3.112692000 | -0.241706000 | -0.514872000 |                                                                                     |
| C                     | -3.675268000 | 0.687390000  | -1.399091000 |                                                                                     |
| C                     | -4.994473000 | 1.110699000  | -1.223496000 |                                                                                     |
| C                     | -5.751976000 | 0.621452000  | -0.158117000 |                                                                                     |
| C                     | -5.189864000 | -0.297929000 | 0.728989000  |                                                                                     |
| Te                    | -1.103457000 | -0.914530000 | -0.818285000 |                                                                                     |
| C                     | -0.412169000 | -0.049869000 | 1.091938000  |                                                                                     |
| O                     | -1.179005000 | 0.290034000  | 1.957681000  |                                                                                     |
| C                     | 1.135954000  | 0.124449000  | 1.216156000  |                                                                                     |
| C                     | 1.904986000  | -0.985753000 | 0.528420000  |                                                                                     |
| C                     | 2.711012000  | -0.728919000 | -0.606344000 |                                                                                     |
| N                     | 2.757941000  | 0.545094000  | -1.183059000 |                                                                                     |
| C                     | 2.277417000  | 1.656537000  | -0.487484000 |                                                                                     |
| C                     | 1.472955000  | 1.497214000  | 0.660997000  |                                                                                     |
| C                     | 3.470197000  | -1.786164000 | -1.149999000 |                                                                                     |
| C                     | 3.403862000  | -3.065246000 | -0.611102000 |                                                                                     |
| C                     | 2.588947000  | -3.328418000 | 0.490269000  |                                                                                     |
| C                     | 1.855987000  | -2.288357000 | 1.050340000  |                                                                                     |
| C                     | 2.587603000  | 2.966076000  | -0.910671000 |                                                                                     |
| C                     | 2.084188000  | 4.072745000  | -0.237272000 |                                                                                     |
| C                     | 1.265197000  | 3.913342000  | 0.882152000  |                                                                                     |
| C                     | 0.974567000  | 2.627968000  | 1.322425000  |                                                                                     |
| O                     | 1.468211000  | 0.260069000  | 2.619940000  |                                                                                     |
| O                     | 0.862909000  | -0.796728000 | 3.415414000  |                                                                                     |
| C                     | 3.327506000  | 0.717903000  | -2.513066000 |                                                                                     |
| H                     | 3.249166000  | 3.123442000  | -1.753043000 |                                                                                     |
| H                     | 2.344563000  | 5.067156000  | -0.588622000 |                                                                                     |
| H                     | 0.867710000  | 4.775433000  | 1.407494000  |                                                                                     |
| H                     | 0.350921000  | 2.477030000  | 2.195708000  |                                                                                     |
| H                     | 1.241333000  | -2.465678000 | 1.923589000  |                                                                                     |
| H                     | 2.531230000  | -4.326159000 | 0.912818000  |                                                                                     |
| H                     | 4.002568000  | -3.856546000 | -1.053284000 |                                                                                     |
| H                     | 4.140776000  | -1.603518000 | -1.979988000 |                                                                                     |
| H                     | 2.824243000  | 1.542867000  | -3.018846000 |                                                                                     |
| H                     | 4.406767000  | 0.921443000  | -2.494683000 |                                                                                     |
| H                     | 3.150327000  | -0.181360000 | -3.103927000 |                                                                                     |
| H                     | -3.450007000 | -1.458783000 | 1.236903000  |                                                                                     |
| H                     | -5.774891000 | -0.681461000 | 1.560305000  |                                                                                     |
| H                     | -6.776308000 | 0.955540000  | -0.019608000 |                                                                                     |
| H                     | -5.424927000 | 1.830065000  | -1.914687000 |                                                                                     |
| H                     | -3.086280000 | 1.086424000  | -2.219254000 |                                                                                     |
| H                     | -0.025538000 | -0.413998000 | 3.540663000  |                                                                                     |

| R = Te                |              |              |             |                                                                                       |
|-----------------------|--------------|--------------|-------------|---------------------------------------------------------------------------------------|
| Structure no. 4       |              |              |             |                                                                                       |
| E = -239.746242242 Ha |              |              |             |                                                                                       |
| Atom                  | X            | Y            | Z           | 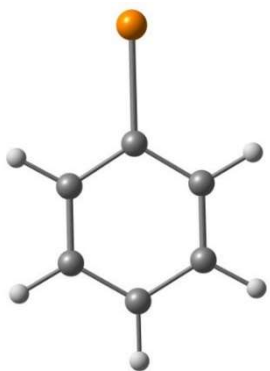 |
| C                     | 1.199037000  | -1.287224000 | 0.000000000 |                                                                                       |
| C                     | 0.000000000  | -0.540690000 | 0.000000000 |                                                                                       |
| C                     | -1.199037000 | -1.287224000 | 0.000000000 |                                                                                       |
| C                     | -1.201319000 | -2.682991000 | 0.000000000 |                                                                                       |
| C                     | 0.000000000  | -3.399270000 | 0.000000000 |                                                                                       |
| C                     | 1.201319000  | -2.682991000 | 0.000000000 |                                                                                       |
| Te                    | 0.000000000  | 1.609792000  | 0.000000000 |                                                                                       |
| H                     | -2.145083000 | -0.752178000 | 0.000000000 |                                                                                       |
| H                     | 2.145083000  | -0.752178000 | 0.000000000 |                                                                                       |
| H                     | -2.151326000 | -3.217499000 | 0.000000000 |                                                                                       |
| H                     | 0.000000000  | -4.487469000 | 0.000000000 |                                                                                       |
| H                     | 2.151326000  | -3.217498000 | 0.000000000 |                                                                                       |

| R = Te                |              |              |              | 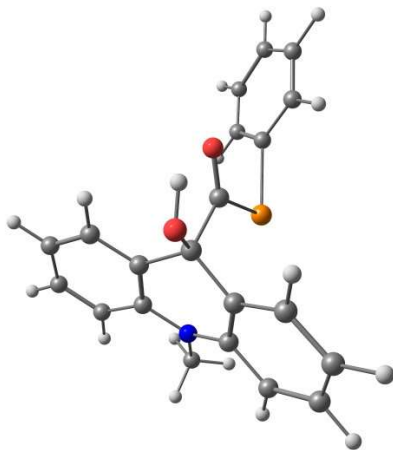 |
|-----------------------|--------------|--------------|--------------|-------------------------------------------------------------------------------------|
| Structure no. 6       |              |              |              |                                                                                     |
| E = -1023.71267584 Ha |              |              |              |                                                                                     |
| Atom                  | X            | Y            | Z            |                                                                                     |
| C                     | 3.734260000  | 0.780390000  | -1.135010000 |                                                                                     |
| C                     | 3.090615000  | -0.212319000 | -0.386001000 |                                                                                     |
| C                     | 3.794953000  | -0.895515000 | 0.612722000  |                                                                                     |
| C                     | 5.132087000  | -0.580615000 | 0.862362000  |                                                                                     |
| C                     | 5.775545000  | 0.402730000  | 0.109074000  |                                                                                     |
| C                     | 5.076353000  | 1.080209000  | -0.890969000 |                                                                                     |
| Te                    | 1.049899000  | -0.699944000 | -0.801707000 |                                                                                     |
| C                     | 0.360494000  | -0.029172000 | 1.168927000  |                                                                                     |
| O                     | 1.134585000  | 0.215114000  | 2.062978000  |                                                                                     |
| C                     | -1.190297000 | 0.124116000  | 1.416403000  |                                                                                     |
| C                     | -1.624061000 | 1.450986000  | 0.801574000  |                                                                                     |
| C                     | -2.247030000 | 1.494687000  | -0.463451000 |                                                                                     |
| N                     | -2.503722000 | 0.304777000  | -1.160179000 |                                                                                     |
| C                     | -2.576138000 | -0.906673000 | -0.456280000 |                                                                                     |
| C                     | -1.964793000 | -1.029399000 | 0.811279000  |                                                                                     |
| C                     | -2.616218000 | 2.746168000  | -0.992367000 |                                                                                     |
| C                     | -2.351454000 | 3.919259000  | -0.291337000 |                                                                                     |
| C                     | -1.733487000 | 3.875684000  | 0.958931000  |                                                                                     |
| C                     | -1.382987000 | 2.639492000  | 1.494440000  |                                                                                     |
| C                     | -3.268210000 | -2.016312000 | -0.980472000 |                                                                                     |
| C                     | -3.333145000 | -3.212557000 | -0.272394000 |                                                                                     |
| C                     | -2.732330000 | -3.331266000 | 0.981844000  |                                                                                     |
| C                     | -2.061785000 | -2.234110000 | 1.513577000  |                                                                                     |
| O                     | -1.353127000 | 0.133908000  | 2.823359000  |                                                                                     |
| C                     | -2.905139000 | 0.358297000  | -2.556777000 |                                                                                     |
| H                     | -3.786075000 | -1.938523000 | -1.928481000 |                                                                                     |
| H                     | -3.875210000 | -4.050699000 | -0.701170000 |                                                                                     |
| H                     | -2.790778000 | -4.261266000 | 1.538151000  |                                                                                     |
| H                     | -1.606397000 | -2.285145000 | 2.496374000  |                                                                                     |
| H                     | -0.920504000 | 2.579247000  | 2.473591000  |                                                                                     |
| H                     | -1.532611000 | 4.788718000  | 1.510148000  |                                                                                     |
| H                     | -2.647736000 | 4.871075000  | -0.723057000 |                                                                                     |
| H                     | -3.138202000 | 2.806919000  | -1.939492000 |                                                                                     |
| H                     | -2.624818000 | -0.573352000 | -3.050803000 |                                                                                     |
| H                     | -3.984952000 | 0.515745000  | -2.692184000 |                                                                                     |
| H                     | -2.368950000 | 1.168000000  | -3.054599000 |                                                                                     |
| H                     | 3.191504000  | 1.323882000  | -1.902180000 |                                                                                     |
| H                     | 5.570380000  | 1.849934000  | -1.477375000 |                                                                                     |
| H                     | 6.817955000  | 0.640508000  | 0.301083000  |                                                                                     |
| H                     | 5.671403000  | -1.109920000 | 1.642942000  |                                                                                     |
| H                     | 3.304434000  | -1.667074000 | 1.196178000  |                                                                                     |
| H                     | -0.463190000 | 0.268930000  | 3.193744000  |                                                                                     |

| R = NH                |              |              |              |                                                                                     |
|-----------------------|--------------|--------------|--------------|-------------------------------------------------------------------------------------|
| Structure no. 1       |              |              |              |                                                                                     |
| E = -995.042190249 Ha |              |              |              |                                                                                     |
| Atom                  | X            | Y            | Z            | 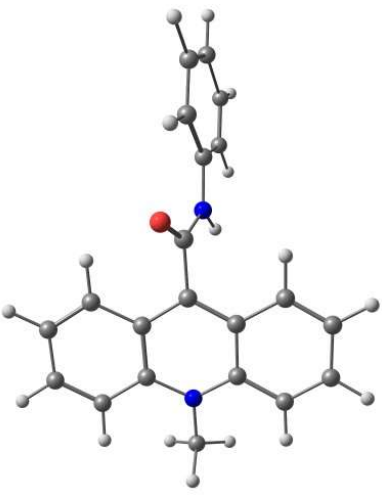 |
| C                     | 3.983850000  | -0.383659000 | -0.841398000 |                                                                                     |
| C                     | 3.251501000  | 0.012528000  | 0.285383000  |                                                                                     |
| C                     | 3.909955000  | 0.351376000  | 1.475278000  |                                                                                     |
| C                     | 5.298594000  | 0.294023000  | 1.542142000  |                                                                                     |
| C                     | 6.038038000  | -0.101793000 | 0.425929000  |                                                                                     |
| C                     | 5.375407000  | -0.437120000 | -0.754691000 |                                                                                     |
| N                     | 1.829882000  | 0.100708000  | 0.293932000  |                                                                                     |
| C                     | 0.949836000  | -0.261921000 | -0.676232000 |                                                                                     |
| O                     | 1.217949000  | -0.708892000 | -1.783532000 |                                                                                     |
| C                     | -0.516275000 | -0.089663000 | -0.304170000 |                                                                                     |
| C                     | -1.094867000 | 1.193144000  | -0.253189000 |                                                                                     |
| C                     | -2.490151000 | 1.322634000  | 0.070234000  |                                                                                     |
| N                     | -3.224646000 | 0.193429000  | 0.364323000  |                                                                                     |
| C                     | -2.707729000 | -1.075443000 | 0.192656000  |                                                                                     |
| C                     | -1.319428000 | -1.235564000 | -0.143613000 |                                                                                     |
| C                     | -0.340062000 | 2.373876000  | -0.533918000 |                                                                                     |
| C                     | -0.929021000 | 3.611012000  | -0.510808000 |                                                                                     |
| C                     | -2.307182000 | 3.722006000  | -0.211765000 |                                                                                     |
| C                     | -3.074739000 | 2.612841000  | 0.072648000  |                                                                                     |
| C                     | -3.514829000 | -2.229793000 | 0.338132000  |                                                                                     |
| C                     | -2.962890000 | -3.483462000 | 0.182274000  |                                                                                     |
| C                     | -1.592125000 | -3.655052000 | -0.121893000 |                                                                                     |
| C                     | -0.791374000 | -2.555245000 | -0.285558000 |                                                                                     |
| C                     | -4.600119000 | 0.343213000  | 0.884085000  |                                                                                     |
| H                     | -4.131699000 | 2.745515000  | 0.254542000  |                                                                                     |
| H                     | -2.779528000 | 4.699015000  | -0.220306000 |                                                                                     |
| H                     | -0.350592000 | 4.499297000  | -0.738470000 |                                                                                     |
| H                     | 0.707358000  | 2.273125000  | -0.792351000 |                                                                                     |
| H                     | 0.248191000  | -2.669093000 | -0.566045000 |                                                                                     |
| H                     | -1.185013000 | -4.652628000 | -0.242596000 |                                                                                     |
| H                     | -3.602039000 | -4.354697000 | 0.283354000  |                                                                                     |
| H                     | -4.574414000 | -2.148835000 | 0.534121000  |                                                                                     |
| H                     | -4.672581000 | 1.268079000  | 1.449436000  |                                                                                     |
| H                     | -5.329363000 | 0.346352000  | 0.069567000  |                                                                                     |
| H                     | -4.814909000 | -0.472256000 | 1.569622000  |                                                                                     |
| H                     | 3.336806000  | 0.657124000  | 2.347928000  |                                                                                     |
| H                     | 5.800607000  | 0.558099000  | 2.467309000  |                                                                                     |
| H                     | 7.120844000  | -0.147022000 | 0.477069000  |                                                                                     |
| H                     | 5.943453000  | -0.743985000 | -1.627215000 |                                                                                     |
| H                     | 3.474007000  | -0.642440000 | -1.758300000 |                                                                                     |
| H                     | 1.430297000  | 0.428906000  | 1.163651000  |                                                                                     |

| R = NH                |              |              |              |
|-----------------------|--------------|--------------|--------------|
| Structure no. 2       |              |              |              |
| E = -1146.19582424 Ha |              |              |              |
| Atom                  | X            | Y            | Z            |
| C                     | 0.427008000  | -2.323719000 | 1.107160000  |
| C                     | 1.018929000  | -1.198068000 | 0.507799000  |
| C                     | 1.995006000  | -1.396079000 | -0.499763000 |
| C                     | 2.406786000  | -2.715336000 | -0.790318000 |
| C                     | 1.824833000  | -3.806328000 | -0.157111000 |
| C                     | 0.812265000  | -3.620905000 | 0.783887000  |
| C                     | 0.651624000  | 0.191284000  | 0.996718000  |
| C                     | 1.368847000  | 1.289496000  | 0.229259000  |
| C                     | 2.299359000  | 1.002319000  | -0.790972000 |
| N                     | 2.526473000  | -0.316604000 | -1.208413000 |
| C                     | 3.001108000  | 2.073911000  | -1.380530000 |
| C                     | 2.760506000  | 3.385982000  | -0.989868000 |
| C                     | 1.825766000  | 3.670548000  | 0.005446000  |
| C                     | 1.149172000  | 2.619504000  | 0.612955000  |
| C                     | -0.888107000 | 0.491490000  | 0.994458000  |
| O                     | -1.379907000 | 1.281707000  | 1.782604000  |
| O                     | 1.156575000  | 0.424200000  | 2.338566000  |
| O                     | 0.470163000  | -0.427343000 | 3.297450000  |
| C                     | 3.271000000  | -0.560587000 | -2.438168000 |
| N                     | -1.573292000 | -0.138185000 | -0.013289000 |
| C                     | -2.929764000 | -0.008807000 | -0.379137000 |
| C                     | -3.371363000 | -0.765464000 | -1.476517000 |
| C                     | -4.694746000 | -0.688544000 | -1.899595000 |
| C                     | -5.598303000 | 0.143046000  | -1.235746000 |
| C                     | -5.157144000 | 0.892574000  | -0.144973000 |
| C                     | -3.834502000 | 0.827159000  | 0.293242000  |
| H                     | 3.762247000  | 1.884825000  | -2.126344000 |
| H                     | 3.320453000  | 4.187548000  | -1.462938000 |
| H                     | 1.638098000  | 4.693279000  | 0.315114000  |
| H                     | 0.432866000  | 2.806571000  | 1.404294000  |
| H                     | -0.351956000 | -2.161936000 | 1.842539000  |
| H                     | 0.335809000  | -4.469162000 | 1.264173000  |
| H                     | 2.167300000  | -4.806398000 | -0.406590000 |
| H                     | 3.205300000  | -2.892243000 | -1.499080000 |
| H                     | 3.103043000  | 0.261137000  | -3.134703000 |
| H                     | 4.351079000  | -0.664837000 | -2.271033000 |
| H                     | 2.901481000  | -1.468350000 | -2.915727000 |
| H                     | -3.494001000 | 1.404887000  | 1.140315000  |
| H                     | -5.850587000 | 1.542277000  | 0.381369000  |
| H                     | -6.631173000 | 0.204326000  | -1.564204000 |
| H                     | -5.017968000 | -1.280823000 | -2.750726000 |
| H                     | -2.671705000 | -1.414441000 | -1.998616000 |
| H                     | 1.161179000  | -1.092883000 | 3.454638000  |
| H                     | -1.038056000 | -0.799626000 | -0.558892000 |

| R = NH                |              |              |             |
|-----------------------|--------------|--------------|-------------|
| Structure no. 4       |              |              |             |
| E = -475.635065838 Ha |              |              |             |
| Atom                  | X            | Y            | Z           |
| C                     | -1.205093000 | 0.259174000  | 0.000000000 |
| C                     | 0.000000000  | 1.067518000  | 0.000000000 |
| C                     | 1.217134000  | 0.278160000  | 0.000000000 |
| C                     | 1.215187000  | -1.105164000 | 0.000000000 |
| C                     | 0.020466000  | -1.852412000 | 0.000000000 |
| C                     | -1.182463000 | -1.128312000 | 0.000000000 |
| N                     | 0.064416000  | 2.395719000  | 0.000000000 |
| H                     | 2.156402000  | 0.829887000  | 0.000000000 |
| H                     | -2.165453000 | 0.780130000  | 0.000000000 |
| H                     | 2.172952000  | -1.631243000 | 0.000000000 |
| H                     | 0.029689000  | -2.940028000 | 0.000000000 |
| H                     | -2.132514000 | -1.668681000 | 0.000000000 |
| H                     | -0.903369000 | 2.746120000  | 0.000000000 |

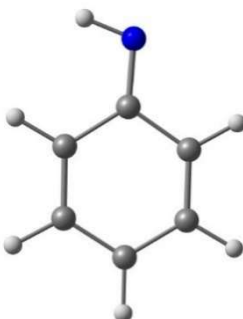

| R = NH                |              |              |              |
|-----------------------|--------------|--------------|--------------|
| Structure no. 6       |              |              |              |
| E = -1071.08223898 Ha |              |              |              |
| Atom                  | X            | Y            | Z            |
| C                     | 1.706569000  | 2.418117000  | -1.297183000 |
| C                     | 1.437738000  | 1.244530000  | -0.595370000 |
| C                     | 1.612636000  | 1.210492000  | 0.802018000  |
| C                     | 2.045982000  | 2.367449000  | 1.466387000  |
| C                     | 2.288376000  | 3.539362000  | 0.749905000  |
| C                     | 2.123730000  | 3.571111000  | -0.633445000 |
| C                     | 0.938389000  | -0.000139000 | -1.326449000 |
| C                     | 1.438131000  | -1.244361000 | -0.595128000 |
| C                     | 1.613126000  | -1.209983000 | 0.802246000  |
| N                     | 1.331895000  | 0.000263000  | 1.492743000  |
| C                     | 2.047033000  | -2.366627000 | 1.466790000  |
| C                     | 2.289719000  | -3.538629000 | 0.750548000  |
| C                     | 2.124849000  | -3.570748000 | -0.632766000 |
| C                     | 1.707229000  | -2.418034000 | -1.296694000 |
| C                     | -0.636648000 | -0.000358000 | -1.384714000 |
| O                     | -1.176750000 | -0.000385000 | -2.490087000 |
| O                     | 1.362220000  | -0.000223000 | -2.667482000 |
| C                     | 1.378376000  | 0.000469000  | 2.947929000  |
| N                     | -1.286279000 | -0.000587000 | -0.193345000 |
| C                     | -2.676837000 | -0.000429000 | 0.059540000  |
| C                     | -3.648309000 | -0.000596000 | -0.952397000 |
| C                     | -4.998427000 | -0.000462000 | -0.601654000 |
| C                     | -5.399916000 | -0.000169000 | 0.734208000  |
| C                     | -4.428895000 | -0.000013000 | 1.736985000  |
| C                     | -3.077677000 | -0.000149000 | 1.404631000  |
| H                     | 2.221831000  | -2.356655000 | 2.535716000  |
| H                     | 2.625647000  | -4.423582000 | 1.283048000  |
| H                     | 2.322338000  | -4.480634000 | -1.190481000 |
| H                     | 1.590932000  | -2.404007000 | -2.374388000 |
| H                     | 1.590392000  | 2.403813000  | -2.374883000 |
| H                     | 2.321048000  | 4.480939000  | -1.191318000 |
| H                     | 2.623881000  | 4.424571000  | 1.282250000  |
| H                     | 2.220543000  | 2.357815000  | 2.535354000  |
| H                     | 0.857729000  | -0.882118000 | 3.323403000  |
| H                     | 2.401915000  | 0.000837000  | 3.350376000  |
| H                     | 0.857206000  | 0.882863000  | 3.323163000  |
| H                     | -2.325129000 | -0.000022000 | 2.189527000  |
| H                     | -4.721190000 | 0.000215000  | 2.782942000  |
| H                     | -6.454440000 | -0.000084000 | 0.991650000  |
| H                     | -5.744070000 | -0.000594000 | -1.391443000 |
| H                     | -3.340731000 | -0.000799000 | -1.988135000 |
| H                     | 0.529379000  | -0.000092000 | -3.184231000 |
| H                     | -0.691400000 | -0.000335000 | 0.629902000  |

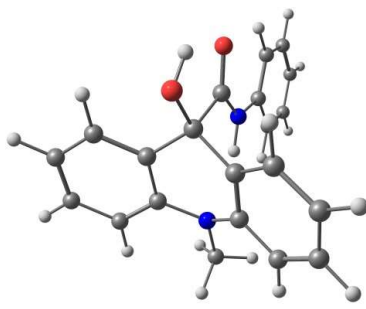

| R = PH                |              |              |              |                                                                                     |
|-----------------------|--------------|--------------|--------------|-------------------------------------------------------------------------------------|
| Structure no. 1       |              |              |              |                                                                                     |
| E = -1281.60578101 Ha |              |              |              |                                                                                     |
| Atom                  | X            | Y            | Z            | 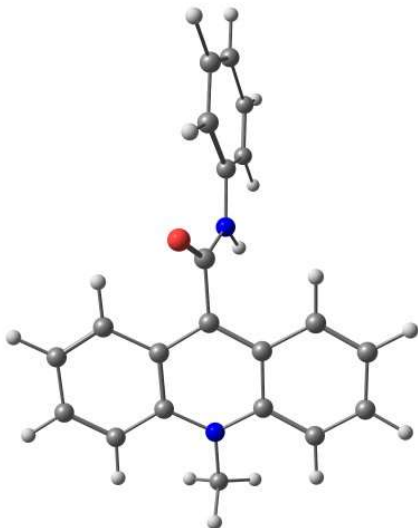 |
| C                     | 4.127088000  | 1.001038000  | -0.611699000 |                                                                                     |
| C                     | 3.299225000  | 0.682260000  | 0.477088000  |                                                                                     |
| C                     | 3.751661000  | -0.221049000 | 1.452428000  |                                                                                     |
| C                     | 5.015421000  | -0.797885000 | 1.335933000  |                                                                                     |
| C                     | 5.829196000  | -0.489625000 | 0.243665000  |                                                                                     |
| C                     | 5.382250000  | 0.405494000  | -0.729700000 |                                                                                     |
| P                     | 1.679913000  | 1.520125000  | 0.625132000  |                                                                                     |
| C                     | 0.718028000  | 0.675839000  | -0.761818000 |                                                                                     |
| O                     | 1.182791000  | 0.547574000  | -1.876249000 |                                                                                     |
| C                     | -0.690223000 | 0.208588000  | -0.451901000 |                                                                                     |
| C                     | -1.725807000 | 1.136345000  | -0.230076000 |                                                                                     |
| C                     | -3.021675000 | 0.658331000  | 0.169742000  |                                                                                     |
| N                     | -3.215110000 | -0.693823000 | 0.363842000  |                                                                                     |
| C                     | -2.253570000 | -1.622916000 | 0.018933000  |                                                                                     |
| C                     | -0.949014000 | -1.175886000 | -0.385033000 |                                                                                     |
| C                     | -1.536478000 | 2.540157000  | -0.418002000 |                                                                                     |
| C                     | -2.566361000 | 3.424232000  | -0.224264000 |                                                                                     |
| C                     | -3.839016000 | 2.938910000  | 0.154040000  |                                                                                     |
| C                     | -4.070042000 | 1.592884000  | 0.346962000  |                                                                                     |
| C                     | -2.522182000 | -3.012522000 | 0.047991000  |                                                                                     |
| C                     | -1.533534000 | -3.915547000 | -0.281828000 |                                                                                     |
| C                     | -0.236658000 | -3.489205000 | -0.649805000 |                                                                                     |
| C                     | 0.046708000  | -2.149033000 | -0.704051000 |                                                                                     |
| C                     | -4.484148000 | -1.162630000 | 0.958174000  |                                                                                     |
| H                     | -5.070382000 | 1.267652000  | 0.594825000  |                                                                                     |
| H                     | -4.661240000 | 3.635759000  | 0.280963000  |                                                                                     |
| H                     | -2.414128000 | 4.486545000  | -0.377843000 |                                                                                     |
| H                     | -0.566370000 | 2.899948000  | -0.739379000 |                                                                                     |
| H                     | 1.026621000  | -1.810054000 | -1.015818000 |                                                                                     |
| H                     | 0.522510000  | -4.220533000 | -0.903316000 |                                                                                     |
| H                     | -1.764890000 | -4.975757000 | -0.267260000 |                                                                                     |
| H                     | -3.507463000 | -3.384746000 | 0.290079000  |                                                                                     |
| H                     | -4.867177000 | -0.402901000 | 1.633863000  |                                                                                     |
| H                     | -5.224626000 | -1.379407000 | 0.183518000  |                                                                                     |
| H                     | -4.294744000 | -2.055084000 | 1.548849000  |                                                                                     |
| H                     | 3.124169000  | -0.470921000 | 2.303205000  |                                                                                     |
| H                     | 5.362361000  | -1.490468000 | 2.096515000  |                                                                                     |
| H                     | 6.812050000  | -0.941713000 | 0.155110000  |                                                                                     |
| H                     | 6.015034000  | 0.650445000  | -1.576827000 |                                                                                     |
| H                     | 3.793212000  | 1.705943000  | -1.366027000 |                                                                                     |
| H                     | 1.114586000  | 0.792905000  | 1.704994000  |                                                                                     |

| R = PH                |              |              |              |
|-----------------------|--------------|--------------|--------------|
| Structure no. 2       |              |              |              |
| E = -1281.60578101 Ha |              |              |              |
| Atom                  | X            | Y            | Z            |
| C                     | -3.756188000 | -1.510813000 | -0.168238000 |
| C                     | -2.815159000 | -0.741113000 | -0.869776000 |
| C                     | -3.244520000 | 0.416295000  | -1.536550000 |
| C                     | -4.586368000 | 0.795544000  | -1.501950000 |
| C                     | -5.513441000 | 0.031452000  | -0.791510000 |
| C                     | -5.093762000 | -1.118682000 | -0.121566000 |
| P                     | -1.072843000 | -1.323975000 | -0.967708000 |
| C                     | -0.510968000 | -1.020398000 | 0.809739000  |
| O                     | -1.203338000 | -1.394561000 | 1.739729000  |
| C                     | 0.879069000  | -0.360488000 | 1.045012000  |
| C                     | 1.933862000  | -0.880111000 | 0.083812000  |
| C                     | 2.555443000  | -0.028012000 | -0.858069000 |
| N                     | 2.138826000  | 1.302254000  | -1.011738000 |
| C                     | 1.337000000  | 1.913874000  | -0.044394000 |
| C                     | 0.684746000  | 1.143593000  | 0.941629000  |
| C                     | 3.598231000  | -0.543851000 | -1.653214000 |
| C                     | 3.978392000  | -1.877608000 | -1.557274000 |
| C                     | 3.337154000  | -2.731765000 | -0.662149000 |
| C                     | 2.328742000  | -2.224041000 | 0.150350000  |
| C                     | 1.154518000  | 3.312352000  | -0.027919000 |
| C                     | 0.320557000  | 3.913237000  | 0.908230000  |
| C                     | -0.349153000 | 3.146642000  | 1.862330000  |
| C                     | -0.152415000 | 1.770856000  | 1.873145000  |
| O                     | 1.259335000  | -0.519483000 | 2.435940000  |
| O                     | 1.188260000  | -1.909721000 | 2.858068000  |
| C                     | 2.579716000  | 2.067042000  | -2.170309000 |
| H                     | 1.688521000  | 3.940385000  | -0.729372000 |
| H                     | 0.204469000  | 4.993101000  | 0.893310000  |
| H                     | -1.003091000 | 3.612931000  | 2.591478000  |
| H                     | -0.643078000 | 1.153252000  | 2.616604000  |
| H                     | 1.847113000  | -2.863383000 | 0.878843000  |
| H                     | 3.623446000  | -3.775596000 | -0.587755000 |
| H                     | 4.785850000  | -2.243547000 | -2.184784000 |
| H                     | 4.136234000  | 0.103786000  | -2.333561000 |
| H                     | 1.817388000  | 2.801396000  | -2.432667000 |
| H                     | 3.530021000  | 2.591803000  | -2.003041000 |
| H                     | 2.694927000  | 1.398832000  | -3.024305000 |
| H                     | -3.441068000 | -2.410017000 | 0.350981000  |
| H                     | -5.809885000 | -1.717781000 | 0.433333000  |
| H                     | -6.557154000 | 0.330118000  | -0.761569000 |
| H                     | -4.904749000 | 1.693881000  | -2.023087000 |
| H                     | -2.529459000 | 1.028318000  | -2.079047000 |
| H                     | 0.225408000  | -1.973689000 | 3.010822000  |
| H                     | -0.490810000 | -0.173836000 | -1.556258000 |

| R = PH                |              |              |             |                                                                                       |
|-----------------------|--------------|--------------|-------------|---------------------------------------------------------------------------------------|
| Structure no. 4       |              |              |             |                                                                                       |
| E = -573.614541130 Ha |              |              |             |                                                                                       |
| Atom                  | X            | Y            | Z           | 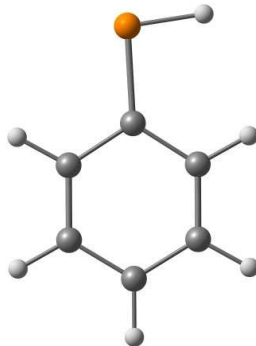 |
| C                     | -1.201510000 | -0.185798000 | 0.000000000 |                                                                                       |
| C                     | 0.000000000  | 0.582890000  | 0.000000000 |                                                                                       |
| C                     | 1.199484000  | -0.191065000 | 0.000000000 |                                                                                       |
| C                     | 1.197356000  | -1.579832000 | 0.000000000 |                                                                                       |
| C                     | -0.003832000 | -2.305165000 | 0.000000000 |                                                                                       |
| C                     | -1.200914000 | -1.576831000 | 0.000000000 |                                                                                       |
| P                     | 0.093148000  | 2.390918000  | 0.000000000 |                                                                                       |
| H                     | 2.153317000  | 0.335049000  | 0.000000000 |                                                                                       |
| H                     | -2.153794000 | 0.340997000  | 0.000000000 |                                                                                       |
| H                     | 2.149223000  | -2.112640000 | 0.000000000 |                                                                                       |
| H                     | -0.005571000 | -3.392764000 | 0.000000000 |                                                                                       |
| H                     | -2.154572000 | -2.106835000 | 0.000000000 |                                                                                       |
| H                     | -1.329325000 | 2.607235000  | 0.000000000 |                                                                                       |

| R = PH                |              |              |              |                                                                                     |
|-----------------------|--------------|--------------|--------------|-------------------------------------------------------------------------------------|
| Structure no. 6       |              |              |              |                                                                                     |
| E = -1357.64293927 Ha |              |              |              |                                                                                     |
| Atom                  | X            | Y            | Z            | 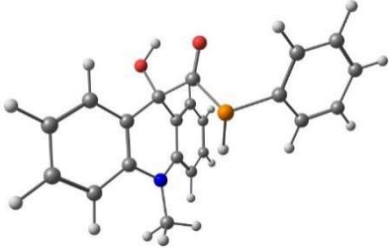 |
| C                     | 0.155033000  | 2.045870000  | -1.888151000 |                                                                                     |
| C                     | 0.794914000  | 1.214380000  | -0.967185000 |                                                                                     |
| C                     | 1.293277000  | 1.758537000  | 0.235276000  |                                                                                     |
| C                     | 1.137870000  | 3.138020000  | 0.468336000  |                                                                                     |
| C                     | 0.480441000  | 3.944876000  | -0.456672000 |                                                                                     |
| C                     | -0.017062000 | 3.405386000  | -1.642338000 |                                                                                     |
| C                     | 0.932670000  | -0.273408000 | -1.277344000 |                                                                                     |
| C                     | 2.050131000  | -0.894022000 | -0.452478000 |                                                                                     |
| C                     | 2.503713000  | -0.284280000 | 0.736550000  |                                                                                     |
| N                     | 1.936416000  | 0.927173000  | 1.167816000  |                                                                                     |
| C                     | 3.537137000  | -0.906598000 | 1.462062000  |                                                                                     |
| C                     | 4.084186000  | -2.111090000 | 1.028586000  |                                                                                     |
| C                     | 3.634750000  | -2.713456000 | -0.146145000 |                                                                                     |
| C                     | 2.628234000  | -2.091855000 | -0.879337000 |                                                                                     |
| C                     | -0.434590000 | -0.983683000 | -0.959600000 |                                                                                     |
| O                     | -1.081334000 | -1.427010000 | -1.893561000 |                                                                                     |
| O                     | 1.166885000  | -0.475115000 | -2.656564000 |                                                                                     |
| C                     | 2.241933000  | 1.432705000  | 2.496271000  |                                                                                     |
| P                     | -1.003333000 | -1.301414000 | 0.801115000  |                                                                                     |
| C                     | -2.775538000 | -0.822388000 | 0.674925000  |                                                                                     |
| C                     | -3.667755000 | -1.675188000 | 0.006787000  |                                                                                     |
| C                     | -5.024925000 | -1.361821000 | -0.061264000 |                                                                                     |
| C                     | -5.511857000 | -0.207856000 | 0.554653000  |                                                                                     |
| C                     | -4.633060000 | 0.639309000  | 1.231261000  |                                                                                     |
| C                     | -3.272001000 | 0.338580000  | 1.286306000  |                                                                                     |
| H                     | 3.939530000  | -0.437902000 | 2.351462000  |                                                                                     |
| H                     | 4.880356000  | -2.568261000 | 1.608946000  |                                                                                     |
| H                     | 4.066320000  | -3.647922000 | -0.489715000 |                                                                                     |
| H                     | 2.279272000  | -2.519280000 | -1.812954000 |                                                                                     |
| H                     | -0.196080000 | 1.605350000  | -2.814812000 |                                                                                     |
| H                     | -0.523836000 | 4.033685000  | -2.367534000 |                                                                                     |
| H                     | 0.375309000  | 5.006215000  | -0.250926000 |                                                                                     |
| H                     | 1.556316000  | 3.593102000  | 1.357528000  |                                                                                     |
| H                     | 2.301325000  | 0.597154000  | 3.195599000  |                                                                                     |
| H                     | 3.185586000  | 1.995371000  | 2.541639000  |                                                                                     |
| H                     | 1.433031000  | 2.084837000  | 2.829540000  |                                                                                     |
| H                     | -2.594417000 | 1.015088000  | 1.799333000  |                                                                                     |
| H                     | -5.004027000 | 1.541490000  | 1.709118000  |                                                                                     |
| H                     | -6.570565000 | 0.029716000  | 0.508402000  |                                                                                     |
| H                     | -5.703486000 | -2.024908000 | -0.589927000 |                                                                                     |
| H                     | -3.299546000 | -2.578439000 | -0.468962000 |                                                                                     |
| H                     | 0.359096000  | -0.911597000 | -2.990473000 |                                                                                     |
| H                     | -0.498530000 | -0.117809000 | 1.390318000  |                                                                                     |



| R = AsH               |              |              |              |                                                                                     |
|-----------------------|--------------|--------------|--------------|-------------------------------------------------------------------------------------|
| Structure no. 1       |              |              |              |                                                                                     |
| E = -3174.02151596 Ha |              |              |              |                                                                                     |
| Atom                  | X            | Y            | Z            | 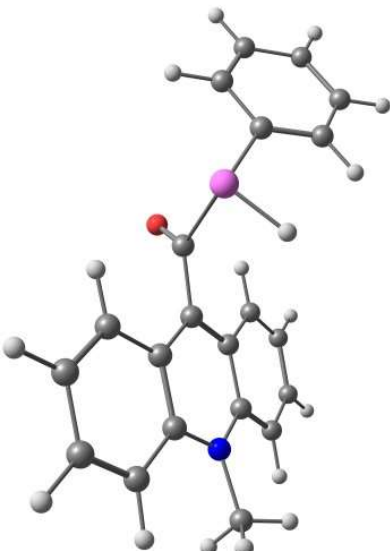 |
| C                     | 3.473450000  | 0.680713000  | -1.212221000 |                                                                                     |
| C                     | 3.190453000  | -0.434580000 | -0.412517000 |                                                                                     |
| C                     | 4.116812000  | -0.843946000 | 0.555945000  |                                                                                     |
| C                     | 5.308377000  | -0.140149000 | 0.728295000  |                                                                                     |
| C                     | 5.587800000  | 0.966717000  | -0.074388000 |                                                                                     |
| C                     | 4.671591000  | 1.374428000  | -1.046521000 |                                                                                     |
| As                    | 1.563073000  | -1.464537000 | -0.587153000 |                                                                                     |
| C                     | 0.568711000  | -0.479291000 | 0.866390000  |                                                                                     |
| O                     | 1.079418000  | -0.239365000 | 1.935722000  |                                                                                     |
| C                     | -0.847856000 | -0.067205000 | 0.540265000  |                                                                                     |
| C                     | -1.154616000 | 1.302470000  | 0.410719000  |                                                                                     |
| C                     | -2.469886000 | 1.683597000  | -0.025266000 |                                                                                     |
| N                     | -3.392975000 | 0.706221000  | -0.340895000 |                                                                                     |
| C                     | -3.149723000 | -0.630302000 | -0.097430000 |                                                                                     |
| C                     | -1.842774000 | -1.042951000 | 0.333776000  |                                                                                     |
| C                     | -2.789081000 | 3.060058000  | -0.111703000 |                                                                                     |
| C                     | -1.836570000 | 4.011319000  | 0.187861000  |                                                                                     |
| C                     | -0.527243000 | 3.648542000  | 0.579023000  |                                                                                     |
| C                     | -0.195470000 | 2.323105000  | 0.691187000  |                                                                                     |
| C                     | -4.158981000 | -1.611048000 | -0.252664000 |                                                                                     |
| C                     | -3.877160000 | -2.939735000 | -0.013231000 |                                                                                     |
| C                     | -2.590049000 | -3.361339000 | 0.391354000  |                                                                                     |
| C                     | -1.598538000 | -2.431051000 | 0.568525000  |                                                                                     |
| C                     | -4.674120000 | 1.103472000  | -0.960611000 |                                                                                     |
| H                     | -5.168681000 | -1.334778000 | -0.521345000 |                                                                                     |
| H                     | -4.669438000 | -3.672781000 | -0.125710000 |                                                                                     |
| H                     | -2.397584000 | -4.411475000 | 0.579730000  |                                                                                     |
| H                     | -0.617845000 | -2.742364000 | 0.908232000  |                                                                                     |
| H                     | 0.796429000  | 2.032433000  | 1.012899000  |                                                                                     |
| H                     | 0.203810000  | 4.417304000  | 0.802687000  |                                                                                     |
| H                     | -2.106246000 | 5.060848000  | 0.127940000  |                                                                                     |
| H                     | -3.784662000 | 3.386068000  | -0.377239000 |                                                                                     |
| H                     | -5.018733000 | 0.307759000  | -1.615231000 |                                                                                     |
| H                     | -5.430604000 | 1.313750000  | -0.199752000 |                                                                                     |
| H                     | -4.515796000 | 1.983686000  | -1.577967000 |                                                                                     |
| H                     | 2.768336000  | 1.004646000  | -1.972096000 |                                                                                     |
| H                     | 4.889273000  | 2.231994000  | -1.675792000 |                                                                                     |
| H                     | 6.520164000  | 1.507822000  | 0.052941000  |                                                                                     |
| H                     | 6.019718000  | -0.462070000 | 1.482179000  |                                                                                     |
| H                     | 3.910244000  | -1.710730000 | 1.176920000  |                                                                                     |
| H                     | 0.904941000  | -0.647963000 | -1.682569000 |                                                                                     |

| R = AsH               |              |              |              |
|-----------------------|--------------|--------------|--------------|
| Structure no. 2       |              |              |              |
| E = -3325.18494918 Ha |              |              |              |
| Atom                  | X            | Y            | Z            |
| C                     | 1.552862000  | 2.429297000  | 1.502510000  |
| C                     | 1.609710000  | 1.271973000  | 0.718769000  |
| C                     | 2.115524000  | 1.340329000  | -0.596989000 |
| C                     | 2.568414000  | 2.578767000  | -1.085354000 |
| C                     | 2.508170000  | 3.718020000  | -0.288530000 |
| C                     | 2.002334000  | 3.651316000  | 1.010214000  |
| C                     | 1.041861000  | -0.044292000 | 1.241155000  |
| C                     | 1.685322000  | -1.232701000 | 0.537911000  |
| C                     | 2.199609000  | -1.071736000 | -0.766785000 |
| N                     | 2.152531000  | 0.187645000  | -1.387509000 |
| C                     | 2.761321000  | -2.178237000 | -1.426437000 |
| C                     | 2.807420000  | -3.422384000 | -0.804497000 |
| C                     | 2.311838000  | -3.581863000 | 0.488685000  |
| C                     | 1.757849000  | -2.487631000 | 1.150441000  |
| C                     | -0.491086000 | 0.063671000  | 0.962835000  |
| O                     | -1.276441000 | 0.361970000  | 1.835091000  |
| O                     | 1.292914000  | -0.015277000 | 2.653447000  |
| O                     | 0.456811000  | -0.975041000 | 3.357348000  |
| C                     | 2.287231000  | 0.293333000  | -2.831030000 |
| As                    | -1.062033000 | -0.108443000 | -0.974176000 |
| C                     | -2.969375000 | -0.090217000 | -0.603794000 |
| C                     | -3.638413000 | 1.139268000  | -0.654568000 |
| C                     | -5.005240000 | 1.221991000  | -0.388275000 |
| C                     | -5.724799000 | 0.068988000  | -0.073506000 |
| C                     | -5.070378000 | -1.162711000 | -0.020702000 |
| C                     | -3.701450000 | -1.238190000 | -0.277028000 |
| H                     | 2.993446000  | 2.646801000  | -2.079556000 |
| H                     | 2.869266000  | 4.661683000  | -0.687043000 |
| H                     | 1.953822000  | 4.539782000  | 1.631102000  |
| H                     | 1.149073000  | 2.354195000  | 2.504756000  |
| H                     | 1.362083000  | -2.597753000 | 2.151814000  |
| H                     | 2.352610000  | -4.548563000 | 0.980204000  |
| H                     | 3.248276000  | -4.263421000 | -1.331744000 |
| H                     | 3.191943000  | -2.060698000 | -2.413695000 |
| H                     | 1.761510000  | 1.186102000  | -3.174118000 |
| H                     | 3.331668000  | 0.345731000  | -3.169174000 |
| H                     | 1.810644000  | -0.571503000 | -3.296296000 |
| H                     | -3.089856000 | 2.043600000  | -0.906368000 |
| H                     | -5.506395000 | 2.184708000  | -0.429716000 |
| H                     | -6.790170000 | 0.129570000  | 0.128974000  |
| H                     | -5.623570000 | -2.064345000 | 0.226401000  |
| H                     | -3.205034000 | -2.202877000 | -0.224939000 |
| H                     | -0.387882000 | -0.482347000 | 3.354454000  |
| H                     | -0.880673000 | -1.610701000 | -0.941945000 |

| R = AsH               |              |              |             |
|-----------------------|--------------|--------------|-------------|
| Structure no. 4       |              |              |             |
| E = -2466.02342961 Ha |              |              |             |
| Atom                  | X            | Y            | Z           |
| C                     | 0.161862000  | -2.508448000 | 0.000000000 |
| C                     | -0.591265000 | -1.338574000 | 0.000000000 |
| C                     | 0.000000000  | -0.045559000 | 0.000000000 |
| C                     | 1.422826000  | -0.043876000 | 0.000000000 |
| C                     | 2.178375000  | -1.210035000 | 0.000000000 |
| C                     | 1.562446000  | -2.470064000 | 0.000000000 |
| As                    | -0.951503000 | 1.612964000  | 0.000000000 |
| H                     | 1.938837000  | 0.915763000  | 0.000000000 |
| H                     | -1.676677000 | -1.412612000 | 0.000000000 |
| H                     | 3.266731000  | -1.139833000 | 0.000000000 |
| H                     | 2.151144000  | -3.384640000 | 0.000000000 |
| H                     | -0.351769000 | -3.470758000 | 0.000000000 |
| H                     | -2.334120000 | 0.963613000  | 0.000000000 |

| R = AsH               |              |              |              |                                                                                     |
|-----------------------|--------------|--------------|--------------|-------------------------------------------------------------------------------------|
| Structure no. 6       |              |              |              |                                                                                     |
| E = -3250.06294234 Ha |              |              |              |                                                                                     |
| Atom                  | X            | Y            | Z            | 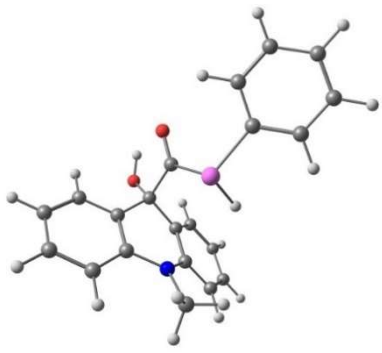 |
| C                     | 0.702670000  | 0.821614000  | -0.128643000 |                                                                                     |
| C                     | 0.337936000  | -0.076496000 | 0.887204000  |                                                                                     |
| C                     | 1.355638000  | -0.663752000 | 1.654154000  |                                                                                     |
| C                     | 2.692946000  | -0.341960000 | 1.418354000  |                                                                                     |
| C                     | 3.041195000  | 0.554688000  | 0.411477000  |                                                                                     |
| C                     | 2.037446000  | 1.134166000  | -0.369149000 |                                                                                     |
| As                    | -1.549133000 | -0.582512000 | 1.057270000  |                                                                                     |
| C                     | -1.746572000 | -0.412126000 | 3.023991000  |                                                                                     |
| O                     | -0.851095000 | -0.730986000 | 3.783195000  |                                                                                     |
| C                     | -3.139971000 | -0.052434000 | 3.673339000  |                                                                                     |
| C                     | -3.761045000 | 1.190285000  | 3.060052000  |                                                                                     |
| C                     | -4.532437000 | 1.075782000  | 1.884138000  |                                                                                     |
| N                     | -4.742586000 | -0.203419000 | 1.324030000  |                                                                                     |
| C                     | -4.758402000 | -1.324802000 | 2.179528000  |                                                                                     |
| C                     | -4.016520000 | -1.275481000 | 3.376868000  |                                                                                     |
| C                     | -5.059254000 | 2.229875000  | 1.295525000  |                                                                                     |
| C                     | -4.818076000 | 3.482823000  | 1.866295000  |                                                                                     |
| C                     | -4.067620000 | 3.597284000  | 3.032378000  |                                                                                     |
| C                     | -3.549610000 | 2.443398000  | 3.627258000  |                                                                                     |
| C                     | -5.494697000 | -2.474782000 | 1.874373000  |                                                                                     |
| C                     | -5.480916000 | -3.566789000 | 2.744527000  |                                                                                     |
| C                     | -4.755371000 | -3.518828000 | 3.932554000  |                                                                                     |
| C                     | -4.028603000 | -2.367312000 | 4.241345000  |                                                                                     |
| O                     | -2.926800000 | 0.114121000  | 5.051415000  |                                                                                     |
| C                     | -5.199981000 | -0.333591000 | -0.048220000 |                                                                                     |
| H                     | -6.100907000 | -2.518071000 | 0.976788000  |                                                                                     |
| H                     | -6.059521000 | -4.450165000 | 2.490446000  |                                                                                     |
| H                     | -4.751853000 | -4.365224000 | 4.611682000  |                                                                                     |
| H                     | -3.462753000 | -2.294359000 | 5.163207000  |                                                                                     |
| H                     | -2.977534000 | 2.497710000  | 4.546753000  |                                                                                     |
| H                     | -3.885379000 | 4.569670000  | 3.478531000  |                                                                                     |
| H                     | -5.238443000 | 4.366140000  | 1.394222000  |                                                                                     |
| H                     | -5.681758000 | 2.161142000  | 0.410744000  |                                                                                     |
| H                     | -4.870507000 | -1.297840000 | -0.441938000 |                                                                                     |
| H                     | -6.291723000 | -0.263590000 | -0.155768000 |                                                                                     |
| H                     | -4.740956000 | 0.451726000  | -0.652861000 |                                                                                     |
| H                     | -0.069862000 | 1.282662000  | -0.740709000 |                                                                                     |
| H                     | 2.291912000  | 1.834582000  | -1.158910000 |                                                                                     |
| H                     | 4.084465000  | 0.800030000  | 0.236333000  |                                                                                     |
| H                     | 3.466359000  | -0.799964000 | 2.029627000  |                                                                                     |
| H                     | 1.099341000  | -1.355464000 | 2.446150000  |                                                                                     |
| H                     | -1.998917000 | -0.158207000 | 5.209278000  |                                                                                     |
| H                     | -2.059833000 | 0.842622000  | 0.844020000  |                                                                                     |

| R = SiH <sub>2</sub>  |              |              |              |
|-----------------------|--------------|--------------|--------------|
| Structure no. 1       |              |              |              |
| E = -1230.35595605 Ha |              |              |              |
| Atom                  | X            | Y            | Z            |
| C                     | -3.914392000 | -0.991816000 | -0.743446000 |
| C                     | -3.305857000 | -0.796389000 | 0.512611000  |
| C                     | -3.957589000 | 0.015727000  | 1.459986000  |
| C                     | -5.186829000 | 0.606095000  | 1.165215000  |
| C                     | -5.777761000 | 0.400994000  | -0.082559000 |
| C                     | -5.140285000 | -0.395645000 | -1.036802000 |
| Si                    | -1.678270000 | -1.606506000 | 0.933357000  |
| C                     | -0.442517000 | -1.262983000 | -0.546332000 |
| O                     | -0.665983000 | -1.749053000 | -1.643082000 |
| C                     | 0.804601000  | -0.408165000 | -0.353231000 |
| C                     | 2.054485000  | -1.027774000 | -0.169166000 |
| C                     | 3.201997000  | -0.215652000 | 0.131530000  |
| N                     | 3.053343000  | 1.150734000  | 0.256035000  |
| C                     | 1.866063000  | 1.783511000  | -0.051403000 |
| C                     | 0.700412000  | 0.994382000  | -0.340370000 |
| C                     | 2.216769000  | -2.443328000 | -0.274075000 |
| C                     | 3.445654000  | -3.026050000 | -0.104342000 |
| C                     | 4.570777000  | -2.213627000 | 0.168203000  |
| C                     | 4.461625000  | -0.843836000 | 0.285007000  |
| C                     | 1.762337000  | 3.194877000  | -0.097087000 |
| C                     | 0.552799000  | 3.791036000  | -0.386554000 |
| C                     | -0.608416000 | 3.025703000  | -0.642895000 |
| C                     | -0.532365000 | 1.657015000  | -0.626408000 |
| C                     | 4.195550000  | 1.955772000  | 0.736906000  |
| H                     | 5.357263000  | -0.264248000 | 0.458075000  |
| H                     | 5.548081000  | -2.672865000 | 0.276709000  |
| H                     | 3.561840000  | -4.100188000 | -0.194492000 |
| H                     | 1.354334000  | -3.050276000 | -0.521212000 |
| H                     | -1.409866000 | 1.061548000  | -0.852618000 |
| H                     | -1.546093000 | 3.521087000  | -0.867941000 |
| H                     | 0.499501000  | 4.874142000  | -0.429696000 |
| H                     | 2.628192000  | 3.823684000  | 0.054046000  |
| H                     | 4.778224000  | 1.366913000  | 1.440367000  |
| H                     | 4.828345000  | 2.275445000  | -0.095325000 |
| H                     | 3.823172000  | 2.823700000  | 1.273777000  |
| H                     | -3.510064000 | 0.182855000  | 2.436280000  |
| H                     | -5.682752000 | 1.222671000  | 1.908619000  |
| H                     | -6.735150000 | 0.859251000  | -0.311258000 |
| H                     | -5.600833000 | -0.557023000 | -2.006611000 |
| H                     | -3.429562000 | -1.609060000 | -1.495045000 |
| H                     | -1.106794000 | -1.040924000 | 2.181886000  |
| H                     | -1.709925000 | -3.087433000 | 1.001100000  |

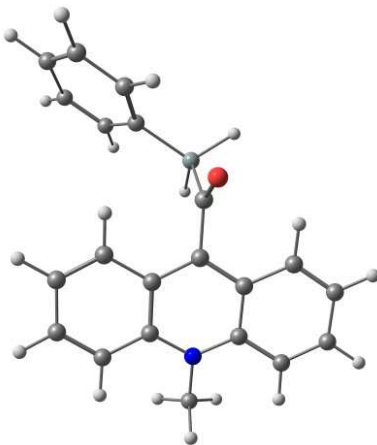

| R = SiH <sub>2</sub>  |              |              |              |                                                                                     |
|-----------------------|--------------|--------------|--------------|-------------------------------------------------------------------------------------|
| Structure no. 2       |              |              |              |                                                                                     |
| E = -1381.51829108 Ha |              |              |              |                                                                                     |
| Atom                  | X            | Y            | Z            | 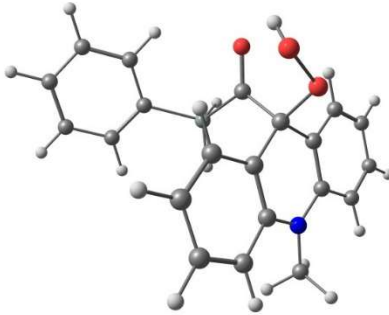 |
| C                     | 3.552791000  | 0.394276000  | -1.670953000 |                                                                                     |
| C                     | 2.968372000  | -0.666593000 | -0.957021000 |                                                                                     |
| C                     | 3.776633000  | -1.393390000 | -0.062430000 |                                                                                     |
| C                     | 5.123332000  | -1.072487000 | 0.105346000  |                                                                                     |
| C                     | 5.688170000  | -0.019573000 | -0.617596000 |                                                                                     |
| C                     | 4.901173000  | 0.714553000  | -1.505453000 |                                                                                     |
| Si                    | 1.159996000  | -1.101017000 | -1.204884000 |                                                                                     |
| C                     | 0.324835000  | -1.299394000 | 0.542611000  |                                                                                     |
| O                     | 0.794739000  | -2.144421000 | 1.297339000  |                                                                                     |
| C                     | -0.905216000 | -0.453829000 | 0.954827000  |                                                                                     |
| C                     | -0.606984000 | 1.025228000  | 0.813560000  |                                                                                     |
| C                     | -1.426212000 | 1.873722000  | 0.032887000  |                                                                                     |
| N                     | -2.454466000 | 1.352597000  | -0.765725000 |                                                                                     |
| C                     | -2.832724000 | 0.012052000  | -0.666756000 |                                                                                     |
| C                     | -2.076316000 | -0.899423000 | 0.102273000  |                                                                                     |
| C                     | -1.176308000 | 3.260259000  | 0.060689000  |                                                                                     |
| C                     | -0.102813000 | 3.781321000  | 0.775708000  |                                                                                     |
| C                     | 0.748683000  | 2.939631000  | 1.487528000  |                                                                                     |
| C                     | 0.481858000  | 1.573719000  | 1.504905000  |                                                                                     |
| C                     | -3.980987000 | -0.472945000 | -1.328257000 |                                                                                     |
| C                     | -4.330100000 | -1.817255000 | -1.266902000 |                                                                                     |
| C                     | -3.561369000 | -2.723334000 | -0.535805000 |                                                                                     |
| C                     | -2.450284000 | -2.249297000 | 0.151277000  |                                                                                     |
| O                     | -1.351208000 | -0.819182000 | 2.288012000  |                                                                                     |
| O                     | -0.286875000 | -0.651055000 | 3.266325000  |                                                                                     |
| C                     | -3.083296000 | 2.202685000  | -1.769492000 |                                                                                     |
| H                     | -4.626056000 | 0.205117000  | -1.871399000 |                                                                                     |
| H                     | -5.221041000 | -2.152687000 | -1.789865000 |                                                                                     |
| H                     | -3.833455000 | -3.772174000 | -0.485893000 |                                                                                     |
| H                     | -1.858856000 | -2.922514000 | 0.762797000  |                                                                                     |
| H                     | 1.102319000  | 0.911420000  | 2.094892000  |                                                                                     |
| H                     | 1.596082000  | 3.337974000  | 2.035346000  |                                                                                     |
| H                     | 0.061303000  | 4.855002000  | 0.772581000  |                                                                                     |
| H                     | -1.833355000 | 3.944850000  | -0.459828000 |                                                                                     |
| H                     | -3.384357000 | 1.598083000  | -2.625085000 |                                                                                     |
| H                     | -3.963728000 | 2.735119000  | -1.386603000 |                                                                                     |
| H                     | -2.361754000 | 2.934799000  | -2.132779000 |                                                                                     |
| H                     | 2.950232000  | 0.979537000  | -2.360941000 |                                                                                     |
| H                     | 5.335158000  | 1.537162000  | -2.066761000 |                                                                                     |
| H                     | 6.737587000  | 0.229008000  | -0.486905000 |                                                                                     |
| H                     | 5.732266000  | -1.643067000 | 0.800865000  |                                                                                     |
| H                     | 3.344888000  | -2.205787000 | 0.515310000  |                                                                                     |
| H                     | 0.216853000  | -1.467296000 | 3.079875000  |                                                                                     |
| H                     | 0.502142000  | -0.067942000 | -2.042867000 |                                                                                     |
| H                     | 0.992422000  | -2.432838000 | -1.843365000 |                                                                                     |

| R = SiH <sub>2</sub>  |              |              |              | 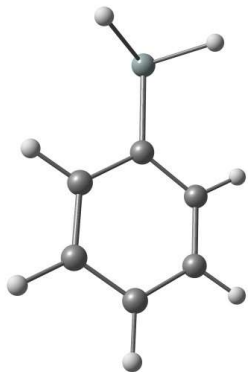 |
|-----------------------|--------------|--------------|--------------|---------------------------------------------------------------------------------------|
| Structure no. 4       |              |              |              |                                                                                       |
| E = -522.347264664 Ha |              |              |              |                                                                                       |
| Atom                  | X            | Y            | Z            |                                                                                       |
| C                     | -1.621157000 | 1.201266000  | -0.000191000 |                                                                                       |
| C                     | -0.225884000 | 1.192996000  | 0.010062000  |                                                                                       |
| C                     | 0.533209000  | -0.000224000 | 0.019042000  |                                                                                       |
| C                     | -0.226195000 | -1.193194000 | 0.010053000  |                                                                                       |
| C                     | -1.621501000 | -1.201074000 | -0.000191000 |                                                                                       |
| C                     | -2.337746000 | 0.000181000  | -0.004083000 |                                                                                       |
| Si                    | 2.475279000  | -0.000031000 | -0.139700000 |                                                                                       |
| H                     | 0.299508000  | -2.147724000 | 0.018427000  |                                                                                       |
| H                     | 0.300134000  | 2.147345000  | 0.018451000  |                                                                                       |
| H                     | -2.157393000 | -2.150629000 | 0.001746000  |                                                                                       |
| H                     | -3.426090000 | 0.000339000  | -0.010215000 |                                                                                       |
| H                     | -2.156817000 | 2.150953000  | 0.001742000  |                                                                                       |
| H                     | 2.740939000  | 1.141328000  | 0.858528000  |                                                                                       |
| H                     | 2.741453000  | -1.140886000 | 0.858965000  |                                                                                       |

| R = SiH <sub>2</sub>  |              |              |              |
|-----------------------|--------------|--------------|--------------|
| Structure no. 6       |              |              |              |
| E = -1306.39547985 Ha |              |              |              |
| Atom                  | X            | Y            | Z            |
| C                     | 0.031585000  | 1.849429000  | -2.012449000 |
| C                     | 0.742633000  | 1.139757000  | -1.042057000 |
| C                     | 1.142796000  | 1.789437000  | 0.145528000  |
| C                     | 0.820783000  | 3.149945000  | 0.311111000  |
| C                     | 0.097338000  | 3.832964000  | -0.662776000 |
| C                     | -0.303687000 | 3.188666000  | -1.832674000 |
| C                     | 1.058679000  | -0.332220000 | -1.278667000 |
| C                     | 2.217027000  | -0.785558000 | -0.399215000 |
| C                     | 2.566475000  | -0.074314000 | 0.769337000  |
| N                     | 1.864278000  | 1.087841000  | 1.123581000  |
| C                     | 3.638915000  | -0.546302000 | 1.549924000  |
| C                     | 4.322586000  | -1.705380000 | 1.192937000  |
| C                     | 3.973960000  | -2.409938000 | 0.041065000  |
| C                     | 2.928999000  | -1.935744000 | -0.747476000 |
| C                     | -0.207002000 | -1.175620000 | -0.911184000 |
| O                     | -0.722850000 | -1.835974000 | -1.807618000 |
| O                     | 1.334091000  | -0.577205000 | -2.641196000 |
| C                     | 2.050915000  | 1.671468000  | 2.441362000  |
| Si                    | -1.028795000 | -1.300597000 | 0.840478000  |
| C                     | -2.852021000 | -0.886219000 | 0.686943000  |
| C                     | -3.654323000 | -1.434813000 | -0.331263000 |
| C                     | -5.012424000 | -1.128740000 | -0.412313000 |
| C                     | -5.595327000 | -0.270093000 | 0.522191000  |
| C                     | -4.814834000 | 0.286108000  | 1.535918000  |
| C                     | -3.455095000 | -0.018396000 | 1.614757000  |
| H                     | 3.964064000  | 0.006119000  | 2.422813000  |
| H                     | 5.145109000  | -2.045729000 | 1.815385000  |
| H                     | 4.511163000  | -3.309004000 | -0.242879000 |
| H                     | 2.654600000  | -2.443287000 | -1.665901000 |
| H                     | -0.239273000 | 1.330057000  | -2.925208000 |
| H                     | -0.861838000 | 3.721483000  | -2.595595000 |
| H                     | -0.137025000 | 4.882129000  | -0.507355000 |
| H                     | 1.160876000  | 3.688904000  | 1.186765000  |
| H                     | 2.185284000  | 0.874116000  | 3.174146000  |
| H                     | 2.914910000  | 2.349232000  | 2.498573000  |
| H                     | 1.154245000  | 2.227134000  | 2.720567000  |
| H                     | -2.858254000 | 0.428307000  | 2.406105000  |
| H                     | -5.262363000 | 0.958624000  | 2.262231000  |
| H                     | -6.653595000 | -0.033249000 | 0.457926000  |
| H                     | -5.616382000 | -1.559338000 | -1.205972000 |
| H                     | -3.209031000 | -2.092668000 | -1.071767000 |
| H                     | 0.628828000  | -1.189158000 | -2.932566000 |
| H                     | -0.807396000 | -2.716150000 | 1.237018000  |
| H                     | -0.398530000 | -0.405235000 | 1.838468000  |

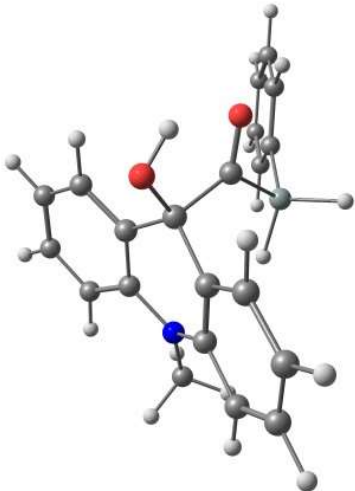

| R = GeH <sub>2</sub>  |              |              |              |                                                                                     |
|-----------------------|--------------|--------------|--------------|-------------------------------------------------------------------------------------|
| Structure no. 1       |              |              |              |                                                                                     |
| E = -3015.85885833 Ha |              |              |              |                                                                                     |
| Atom                  | X            | Y            | Z            | 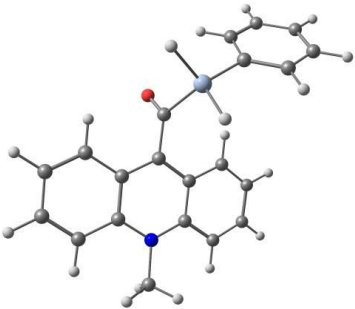 |
| C                     | -3.847288000 | -0.587864000 | -1.046257000 |                                                                                     |
| C                     | -3.253335000 | 0.470485000  | -0.342128000 |                                                                                     |
| C                     | -3.888103000 | 0.972882000  | 0.804878000  |                                                                                     |
| C                     | -5.093594000 | 0.423602000  | 1.239024000  |                                                                                     |
| C                     | -5.679015000 | -0.627972000 | 0.529805000  |                                                                                     |
| C                     | -5.055225000 | -1.134506000 | -0.611513000 |                                                                                     |
| Ge                    | -1.609175000 | 1.248350000  | -0.965583000 |                                                                                     |
| C                     | -0.284296000 | 1.127133000  | 0.544690000  |                                                                                     |
| O                     | -0.504047000 | 1.741629000  | 1.571274000  |                                                                                     |
| C                     | 0.988608000  | 0.315874000  | 0.387179000  |                                                                                     |
| C                     | 0.925362000  | -1.088732000 | 0.328618000  |                                                                                     |
| C                     | 2.124481000  | -1.836165000 | 0.071598000  |                                                                                     |
| N                     | 3.305532000  | -1.162235000 | -0.164338000 |                                                                                     |
| C                     | 3.407196000  | 0.205386000  | -0.008528000 |                                                                                     |
| C                     | 2.223733000  | 0.978459000  | 0.256010000  |                                                                                     |
| C                     | 2.060893000  | -3.251073000 | 0.076026000  |                                                                                     |
| C                     | 0.857691000  | -3.889107000 | 0.291700000  |                                                                                     |
| C                     | -0.336218000 | -3.163402000 | 0.510886000  |                                                                                     |
| C                     | -0.300116000 | -1.793289000 | 0.535574000  |                                                                                     |
| C                     | 4.653688000  | 0.871620000  | -0.091528000 |                                                                                     |
| C                     | 4.716593000  | 2.241920000  | 0.049398000  |                                                                                     |
| C                     | 3.555378000  | 3.017336000  | 0.274027000  |                                                                                     |
| C                     | 2.337584000  | 2.397683000  | 0.379372000  |                                                                                     |
| C                     | 4.493318000  | -1.923781000 | -0.604342000 |                                                                                     |
| H                     | 5.572989000  | 0.320841000  | -0.230548000 |                                                                                     |
| H                     | 5.683892000  | 2.730893000  | -0.005835000 |                                                                                     |
| H                     | 3.634232000  | 4.093757000  | 0.376493000  |                                                                                     |
| H                     | 1.445077000  | 2.976400000  | 0.579774000  |                                                                                     |
| H                     | -1.206620000 | -1.233698000 | 0.739057000  |                                                                                     |
| H                     | -1.268825000 | -3.690790000 | 0.676699000  |                                                                                     |
| H                     | 0.833999000  | -4.974028000 | 0.303513000  |                                                                                     |
| H                     | 2.951187000  | -3.850443000 | -0.050765000 |                                                                                     |
| H                     | 5.093778000  | -1.302685000 | -1.263607000 |                                                                                     |
| H                     | 5.092059000  | -2.245910000 | 0.251786000  |                                                                                     |
| H                     | 4.173675000  | -2.788418000 | -1.179116000 |                                                                                     |
| H                     | -3.365970000 | -0.986836000 | -1.935206000 |                                                                                     |
| H                     | -5.512067000 | -1.948560000 | -1.165886000 |                                                                                     |
| H                     | -6.620962000 | -1.050409000 | 0.865932000  |                                                                                     |
| H                     | -5.579066000 | 0.818520000  | 2.125999000  |                                                                                     |
| H                     | -3.437038000 | 1.788560000  | 1.362666000  |                                                                                     |
| H                     | -1.058596000 | 0.489471000  | -2.180848000 |                                                                                     |
| H                     | -1.688498000 | 2.749829000  | -1.238225000 |                                                                                     |

| R = GeH <sub>2</sub>  |              |              |              |                                                                                     |
|-----------------------|--------------|--------------|--------------|-------------------------------------------------------------------------------------|
| Structure no. 2       |              |              |              |                                                                                     |
| E = -3167.02306322 Ha |              |              |              |                                                                                     |
| Atom                  | X            | Y            | Z            | 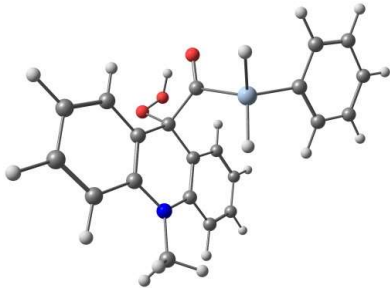 |
| C                     | 3.234267000  | 0.700190000  | -0.958299000 |                                                                                     |
| C                     | 2.840763000  | -0.630274000 | -0.755987000 |                                                                                     |
| C                     | 3.814541000  | -1.571731000 | -0.393361000 |                                                                                     |
| C                     | 5.146474000  | -1.191689000 | -0.228165000 |                                                                                     |
| C                     | 5.525215000  | 0.136046000  | -0.433411000 |                                                                                     |
| C                     | 4.566403000  | 1.082416000  | -0.798678000 |                                                                                     |
| Ge                    | 0.995021000  | -1.159116000 | -0.969150000 |                                                                                     |
| C                     | 0.128941000  | -1.218586000 | 0.830914000  |                                                                                     |
| O                     | 0.547978000  | -2.014179000 | 1.655023000  |                                                                                     |
| C                     | -1.058453000 | -0.275145000 | 1.118093000  |                                                                                     |
| C                     | -2.214381000 | -0.747480000 | 0.260027000  |                                                                                     |
| C                     | -2.872299000 | 0.108862000  | -0.649079000 |                                                                                     |
| N                     | -2.406461000 | 1.405725000  | -0.877982000 |                                                                                     |
| C                     | -1.383428000 | 1.954509000  | -0.092532000 |                                                                                     |
| C                     | -0.661061000 | 1.158474000  | 0.826797000  |                                                                                     |
| C                     | -4.014230000 | -0.384033000 | -1.315198000 |                                                                                     |
| C                     | -4.444822000 | -1.692556000 | -1.127336000 |                                                                                     |
| C                     | -3.766255000 | -2.551561000 | -0.262328000 |                                                                                     |
| C                     | -2.664662000 | -2.063496000 | 0.429997000  |                                                                                     |
| C                     | -1.041467000 | 3.316405000  | -0.214621000 |                                                                                     |
| C                     | 0.032355000  | 3.852040000  | 0.488975000  |                                                                                     |
| C                     | 0.792999000  | 3.050767000  | 1.337914000  |                                                                                     |
| C                     | 0.433749000  | 1.716015000  | 1.501365000  |                                                                                     |
| O                     | -1.564737000 | -0.474175000 | 2.461596000  |                                                                                     |
| O                     | -0.513012000 | -0.285944000 | 3.450159000  |                                                                                     |
| C                     | -2.927769000 | 2.165134000  | -2.008491000 |                                                                                     |
| H                     | -4.589835000 | 0.262443000  | -1.964600000 |                                                                                     |
| H                     | -5.327515000 | -2.036289000 | -1.658745000 |                                                                                     |
| H                     | -4.099988000 | -3.573236000 | -0.116199000 |                                                                                     |
| H                     | -2.142048000 | -2.695942000 | 1.139785000  |                                                                                     |
| H                     | 0.983402000  | 1.091052000  | 2.193515000  |                                                                                     |
| H                     | 1.640654000  | 3.458656000  | 1.878226000  |                                                                                     |
| H                     | 0.268300000  | 4.905469000  | 0.368982000  |                                                                                     |
| H                     | -1.626831000 | 3.972813000  | -0.845205000 |                                                                                     |
| H                     | -3.223593000 | 1.480902000  | -2.803692000 |                                                                                     |
| H                     | -3.789884000 | 2.789951000  | -1.741247000 |                                                                                     |
| H                     | -2.142851000 | 2.804858000  | -2.412252000 |                                                                                     |
| H                     | 3.532146000  | -2.608175000 | -0.229674000 |                                                                                     |
| H                     | 5.889714000  | -1.931313000 | 0.055500000  |                                                                                     |
| H                     | 6.563068000  | 0.431835000  | -0.309486000 |                                                                                     |
| H                     | 4.855880000  | 2.116925000  | -0.960024000 |                                                                                     |
| H                     | 2.492725000  | 1.444789000  | -1.234802000 |                                                                                     |
| H                     | -0.058233000 | -1.145726000 | 3.354316000  |                                                                                     |
| H                     | 0.280164000  | -0.211480000 | -1.939752000 |                                                                                     |
| H                     | 0.936146000  | -2.597329000 | -1.489781000 |                                                                                     |

| R = GeH <sub>2</sub>  |              |              |             |                                                                                       |
|-----------------------|--------------|--------------|-------------|---------------------------------------------------------------------------------------|
| Structure no. 4       |              |              |             |                                                                                       |
| E = -2307.81227692 Ha |              |              |             |                                                                                       |
| Atom                  | X            | Y            | Z           | 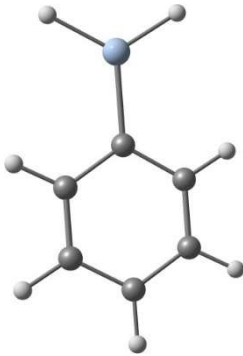 |
| C                     | -1.199266000 | 2.198439000  | 0.000000000 |                                                                                       |
| C                     | -1.202870000 | 0.811348000  | 0.000000000 |                                                                                       |
| C                     | 0.000000000  | 0.044739000  | 0.000000000 |                                                                                       |
| C                     | 1.203486000  | 0.810261000  | 0.000000000 |                                                                                       |
| C                     | 1.201066000  | 2.197392000  | 0.000000000 |                                                                                       |
| C                     | 0.001250000  | 2.927799000  | 0.000000000 |                                                                                       |
| Ge                    | -0.000765000 | -1.836885000 | 0.000000000 |                                                                                       |
| H                     | 2.157388000  | 0.285396000  | 0.000000000 |                                                                                       |
| H                     | -2.157214000 | 0.287284000  | 0.000000000 |                                                                                       |
| H                     | 2.154308000  | 2.727648000  | 0.000000000 |                                                                                       |
| H                     | 0.001747000  | 4.014926000  | 0.000000000 |                                                                                       |
| H                     | -2.152034000 | 2.729534000  | 0.000000000 |                                                                                       |
| H                     | 1.314956000  | -2.602332000 | 0.000000000 |                                                                                       |
| H                     | -1.316670000 | -2.601999000 | 0.000000000 |                                                                                       |



| R = GeH <sub>2</sub>  |              |              |              |
|-----------------------|--------------|--------------|--------------|
| Structure no. 6       |              |              |              |
| E = -3091.89958062 Ha |              |              |              |
| Atom                  | X            | Y            | Z            |
| C                     | 3.012001000  | 0.506171000  | -0.620313000 |
| C                     | 2.649671000  | -0.846486000 | -0.541766000 |
| C                     | 3.653988000  | -1.801698000 | -0.333894000 |
| C                     | 4.988035000  | -1.415304000 | -0.200642000 |
| C                     | 5.335927000  | -0.066346000 | -0.280555000 |
| C                     | 4.345121000  | 0.894769000  | -0.490463000 |
| Ge                    | 0.805763000  | -1.393181000 | -0.720555000 |
| C                     | -0.079161000 | -1.181419000 | 1.053458000  |
| O                     | 0.308982000  | -1.904258000 | 1.956210000  |
| C                     | -1.188870000 | -0.130726000 | 1.370939000  |
| C                     | -0.645939000 | 1.247071000  | 1.019012000  |
| C                     | -0.934831000 | 1.844584000  | -0.227467000 |
| N                     | -1.773817000 | 1.195089000  | -1.143164000 |
| C                     | -2.650857000 | 0.193494000  | -0.698857000 |
| C                     | -2.411482000 | -0.465092000 | 0.525871000  |
| C                     | -0.376774000 | 3.105402000  | -0.516051000 |
| C                     | 0.460886000  | 3.738346000  | 0.399417000  |
| C                     | 0.747888000  | 3.145033000  | 1.628799000  |
| C                     | 0.184924000  | 1.906803000  | 1.926758000  |
| C                     | -3.788935000 | -0.163006000 | -1.446097000 |
| C                     | -4.644408000 | -1.167538000 | -1.001498000 |
| C                     | -4.402281000 | -1.824430000 | 0.204731000  |
| C                     | -3.290569000 | -1.459605000 | 0.959437000  |
| O                     | -1.476604000 | -0.232024000 | 2.748352000  |
| C                     | -1.831645000 | 1.651272000  | -2.522045000 |
| H                     | -4.026218000 | 0.362434000  | -2.363075000 |
| H                     | -5.514604000 | -1.422845000 | -1.599245000 |
| H                     | -5.071701000 | -2.603058000 | 0.555610000  |
| H                     | -3.092439000 | -1.931566000 | 1.915625000  |
| H                     | 0.369283000  | 1.431177000  | 2.883851000  |
| H                     | 1.394912000  | 3.640125000  | 2.345453000  |
| H                     | 0.874686000  | 4.711386000  | 0.150656000  |
| H                     | -0.622057000 | 3.611315000  | -1.441828000 |
| H                     | -2.103389000 | 0.814444000  | -3.167394000 |
| H                     | -2.552612000 | 2.465681000  | -2.681237000 |
| H                     | -0.842816000 | 1.996183000  | -2.829907000 |
| H                     | 2.248014000  | 1.262886000  | -0.778349000 |
| H                     | 4.610173000  | 1.946366000  | -0.552413000 |
| H                     | 6.374599000  | 0.235337000  | -0.179610000 |
| H                     | 5.756313000  | -2.165873000 | -0.038305000 |
| H                     | 3.395854000  | -2.855156000 | -0.269188000 |
| H                     | -0.902643000 | -0.953931000 | 3.072699000  |
| H                     | 0.116485000  | -0.614496000 | -1.842092000 |
| H                     | 0.765319000  | -2.891757000 | -1.010498000 |

| Structure no. 3       |              |              |              | 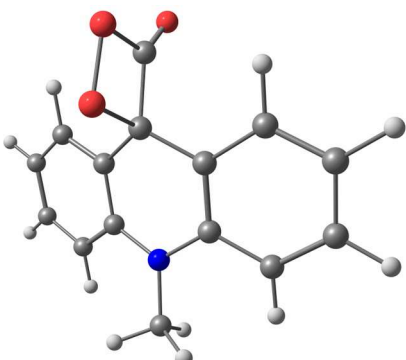 |
|-----------------------|--------------|--------------|--------------|-------------------------------------------------------------------------------------|
| E = -858.562621852 Ha |              |              |              |                                                                                     |
| Atom                  | X            | Y            | Z            |                                                                                     |
| C                     | 0.000001668  | 0.000001693  | -0.000001706 |                                                                                     |
| C                     | -0.000001089 | -0.000001851 | 0.000001165  |                                                                                     |
| C                     | -0.000000367 | -0.000001169 | -0.000000734 |                                                                                     |
| C                     | -0.000002814 | 0.000000924  | 0.000001399  |                                                                                     |
| C                     | -0.000000362 | 0.000001022  | -0.000004683 |                                                                                     |
| C                     | 0.000002700  | 0.000001164  | 0.000003988  |                                                                                     |
| H                     | -0.000002124 | -0.000001075 | -0.000000977 |                                                                                     |
| H                     | -0.000000648 | -0.000000525 | 0.000000174  |                                                                                     |
| H                     | -0.000000321 | -0.000000268 | -0.000000218 |                                                                                     |
| H                     | -0.000000691 | 0.000002504  | 0.000001310  |                                                                                     |
| C                     | -0.000017086 | 0.000054670  | 0.000000418  |                                                                                     |
| C                     | 0.000010024  | -0.000005601 | 0.000004297  |                                                                                     |
| C                     | 0.000000008  | 0.000002454  | 0.000003356  |                                                                                     |
| N                     | 0.000000508  | -0.000004494 | -0.000002943 |                                                                                     |
| C                     | 0.000010417  | -0.000023592 | -0.000005269 |                                                                                     |
| C                     | 0.000002427  | 0.000000477  | 0.000001251  |                                                                                     |
| C                     | -0.000002474 | 0.000002539  | -0.000002411 |                                                                                     |
| C                     | 0.000001761  | 0.000000169  | -0.000000460 |                                                                                     |
| C                     | -0.000000665 | -0.000000821 | 0.000001710  |                                                                                     |
| C                     | -0.000000299 | -0.000001818 | -0.000000104 |                                                                                     |
| H                     | -0.000000966 | 0.000001462  | -0.000000044 |                                                                                     |
| H                     | -0.000000352 | 0.000000638  | 0.000000331  |                                                                                     |
| H                     | -0.000000532 | -0.000000897 | 0.000000546  |                                                                                     |
| H                     | -0.000000829 | -0.000002301 | 0.000003179  |                                                                                     |
| H                     | 0.000001748  | -0.000002958 | 0.000000892  |                                                                                     |
| H                     | -0.000001643 | -0.000002553 | -0.000000051 |                                                                                     |
| H                     | -0.000000226 | -0.000002195 | -0.000003133 |                                                                                     |
| O                     | -0.000004137 | 0.000004980  | 0.000005157  |                                                                                     |
| O                     | -0.000005940 | 0.000022784  | 0.000000099  |                                                                                     |
| O                     | 0.000012303  | -0.000045363 | -0.000006540 |                                                                                     |

| Structure no. 5       |              |              |              |                                                                                       |
|-----------------------|--------------|--------------|--------------|---------------------------------------------------------------------------------------|
| E = -670.130875334 Ha |              |              |              |                                                                                       |
| Atom                  | X            | Y            | Z            | 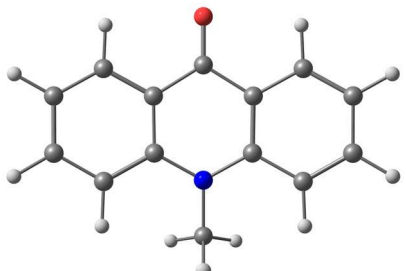 |
| C                     | -0.000001670 | -0.000000453 | -0.000001193 |                                                                                       |
| C                     | 0.000008374  | -0.000005822 | -0.000001257 |                                                                                       |
| C                     | 0.000002869  | 0.000003676  | -0.000003162 |                                                                                       |
| C                     | -0.000004216 | 0.000000572  | 0.000006893  |                                                                                       |
| C                     | -0.000005048 | 0.000000891  | -0.000003333 |                                                                                       |
| C                     | 0.000004889  | -0.000001754 | -0.000002000 |                                                                                       |
| N                     | -0.000012637 | 0.000017666  | -0.000007600 |                                                                                       |
| C                     | 0.000006051  | -0.000000082 | 0.000013394  |                                                                                       |
| C                     | -0.000000121 | 0.000000061  | -0.000000647 |                                                                                       |
| C                     | 0.000007382  | -0.000003957 | 0.000003724  |                                                                                       |
| C                     | 0.000002584  | 0.000000596  | -0.000005419 |                                                                                       |
| C                     | -0.000003789 | -0.000000740 | -0.000003533 |                                                                                       |
| C                     | 0.000000399  | 0.000001187  | 0.000002142  |                                                                                       |
| C                     | -0.000007344 | -0.000001750 | 0.000004438  |                                                                                       |
| O                     | -0.000006036 | 0.000000369  | -0.000002764 |                                                                                       |
| H                     | 0.000004494  | -0.000002110 | -0.000007293 |                                                                                       |
| H                     | 0.000001227  | -0.000000156 | 0.000000932  |                                                                                       |
| H                     | 0.000001465  | 0.000000453  | 0.000000462  |                                                                                       |
| H                     | -0.000001085 | 0.000000180  | 0.000002749  |                                                                                       |
| H                     | 0.000001397  | 0.000000188  | -0.000001976 |                                                                                       |
| H                     | 0.000001000  | 0.000000064  | 0.000001035  |                                                                                       |
| H                     | 0.000000113  | 0.000000643  | 0.000000580  |                                                                                       |
| H                     | -0.000002946 | -0.000001652 | 0.000004237  |                                                                                       |
| C                     | 0.000015838  | -0.000020655 | 0.000006897  |                                                                                       |
| H                     | -0.000003439 | 0.000010208  | -0.000003254 |                                                                                       |
| H                     | -0.000003390 | 0.000004209  | -0.000004274 |                                                                                       |
| H                     | -0.000006362 | -0.000001834 | 0.000000222  |                                                                                       |

| Structure no. 5*      |              |              |              |
|-----------------------|--------------|--------------|--------------|
| E = -669.953518683 Ha |              |              |              |
| Atom                  | X            | Y            | Z            |
| C                     | 0.001468800  | 0.001306003  | -0.014311619 |
| C                     | 0.004149509  | -0.000735113 | 0.018325511  |
| C                     | -0.007929979 | 0.000236431  | 0.003322763  |
| C                     | 0.006366228  | -0.000302096 | -0.001943657 |
| C                     | 0.002246243  | -0.000461559 | 0.001194686  |
| C                     | -0.005244037 | -0.001119324 | -0.002114223 |
| C                     | 0.002234971  | 0.002222086  | 0.001039014  |
| C                     | -0.001297352 | -0.000930055 | -0.008452168 |
| C                     | 0.017660061  | -0.003111007 | -0.005658745 |
| N                     | -0.006147717 | -0.003163889 | -0.003149872 |
| C                     | 0.001646542  | 0.000527929  | 0.006435157  |
| C                     | 0.002147453  | -0.000444212 | 0.001369963  |
| C                     | -0.004625234 | -0.001228109 | -0.003212401 |
| C                     | -0.011272831 | 0.003546751  | 0.008307965  |
| C                     | 0.002077794  | 0.004103694  | 0.000763843  |
| O                     | -0.002882271 | -0.000726284 | -0.001551682 |
| H                     | 0.000157316  | 0.000901467  | 0.000726183  |
| H                     | 0.000013596  | -0.000065916 | 0.000470644  |
| H                     | 0.000088075  | 0.000455664  | 0.000087984  |
| H                     | -0.000411324 | 0.000239363  | 0.000014109  |
| H                     | -0.000182535 | 0.000199133  | -0.000392060 |
| H                     | 0.000158968  | 0.000443207  | -0.000037869 |
| H                     | 0.000401083  | -0.000134057 | -0.000217245 |
| H                     | 0.000774354  | 0.000792950  | -0.000369232 |
| H                     | -0.000473261 | -0.000738933 | 0.000646528  |
| H                     | 0.000239722  | -0.000864334 | -0.000619243 |
| H                     | -0.001364177 | -0.000949789 | -0.000674335 |

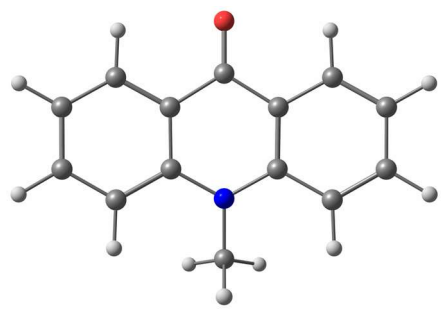

| Structure no. 7       |              |              |              | 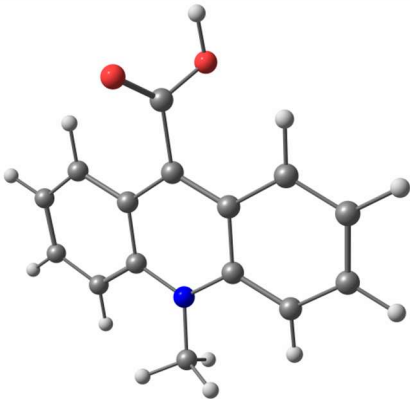 |
|-----------------------|--------------|--------------|--------------|---------------------------------------------------------------------------------------|
| E = -783.845241706 Ha |              |              |              |                                                                                       |
| Atom                  | X            | Y            | Z            |                                                                                       |
| C                     | -0.000003697 | 0.000002446  | -0.000014793 |                                                                                       |
| C                     | 0.000002314  | -0.000000933 | 0.000008333  |                                                                                       |
| C                     | -0.000001217 | -0.000003198 | 0.000002700  |                                                                                       |
| C                     | 0.000004336  | 0.000000328  | 0.000001581  |                                                                                       |
| C                     | 0.000004926  | -0.000001305 | 0.000003524  |                                                                                       |
| C                     | -0.000007755 | -0.000001029 | -0.000007555 |                                                                                       |
| N                     | 0.000007393  | 0.000000704  | 0.000000979  |                                                                                       |
| C                     | -0.000005213 | -0.000002967 | -0.000001330 |                                                                                       |
| C                     | 0.000000330  | 0.000003971  | 0.000003834  |                                                                                       |
| C                     | -0.000011000 | -0.000008618 | -0.000007880 |                                                                                       |
| C                     | -0.000002247 | 0.000003865  | -0.000007202 |                                                                                       |
| C                     | -0.000002250 | 0.000001186  | 0.000006776  |                                                                                       |
| C                     | 0.000003876  | 0.000000304  | 0.000005644  |                                                                                       |
| C                     | 0.000009818  | 0.000004769  | -0.000005549 |                                                                                       |
| C                     | -0.000012508 | 0.000004987  | 0.000019564  |                                                                                       |
| O                     | 0.000003593  | 0.000002240  | 0.000001128  |                                                                                       |
| C                     | -0.000008468 | -0.000005079 | -0.000006976 |                                                                                       |
| O                     | -0.000006529 | -0.000007501 | -0.000010075 |                                                                                       |
| H                     | 0.000001778  | 0.000001712  | 0.000001095  |                                                                                       |
| H                     | -0.000000735 | 0.000001005  | 0.000000100  |                                                                                       |
| H                     | 0.000002823  | 0.000000808  | 0.000000856  |                                                                                       |
| H                     | 0.000009003  | 0.000001827  | -0.000001928 |                                                                                       |
| H                     | 0.000001635  | 0.000000603  | 0.000003297  |                                                                                       |
| H                     | 0.000001306  | -0.000000319 | 0.000001102  |                                                                                       |
| H                     | -0.000001737 | -0.000001334 | -0.000000322 |                                                                                       |
| H                     | -0.000001556 | -0.000001767 | -0.000002097 |                                                                                       |
| H                     | 0.000002183  | 0.000002078  | -0.000006761 |                                                                                       |
| H                     | -0.000000947 | -0.000001576 | 0.000003175  |                                                                                       |
| H                     | 0.000002443  | 0.000002699  | -0.000000949 |                                                                                       |
| H                     | 0.000008102  | 0.000000095  | 0.000009727  |                                                                                       |

| Structure CO <sub>2</sub> |              |              |              |                                                                                     |
|---------------------------|--------------|--------------|--------------|-------------------------------------------------------------------------------------|
| $E = -188.580938479$ Ha   |              |              |              |                                                                                     |
| Atom                      | X            | Y            | Z            |  |
| C                         | -0.000683228 | -0.000000000 | -0.000001192 |                                                                                     |
| O                         | 0.000341891  | 0.000000000  | -0.000158006 |                                                                                     |
| O                         | 0.000341337  | 0.000000000  | 0.000159199  |                                                                                     |

| Structure H <sub>2</sub> O |              |              |              |                                                                                     |
|----------------------------|--------------|--------------|--------------|-------------------------------------------------------------------------------------|
| $E = -76.4197366208$ Ha    |              |              |              |                                                                                     |
| Atom                       | X            | Y            | Z            | 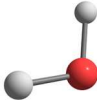 |
| O                          | -0.000092754 | 0.000000000  | -0.000065587 |                                                                                     |
| H                          | 0.000031598  | 0.000000000  | 0.000053695  |                                                                                     |
| H                          | 0.000061157  | -0.000000000 | 0.000011892  |                                                                                     |

| Structure OH <sup>-</sup> |             |             |              |                                                                                     |
|---------------------------|-------------|-------------|--------------|-------------------------------------------------------------------------------------|
| $E = -75.7262923857$ Ha   |             |             |              |                                                                                     |
| Atom                      | X           | Y           | Z            |  |
| O                         | 0.000000000 | 0.000000000 | 0.000008875  |                                                                                     |
| H                         | 0.000000000 | 0.000000000 | -0.000008875 |                                                                                     |

| Structure OOH <sup>-</sup> |              |              |              |                                                                                     |
|----------------------------|--------------|--------------|--------------|-------------------------------------------------------------------------------------|
| $E = -75.7262923857$ Ha    |              |              |              |                                                                                     |
| Atom                       | X            | Y            | Z            | 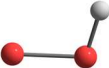 |
| O                          | 0.000158315  | 0.000000000  | -0.000030230 |                                                                                     |
| O                          | -0.000018291 | -0.000000000 | 0.000013673  |                                                                                     |
| H                          | -0.000140024 | -0.000000000 | 0.000016557  |                                                                                     |
